# Supplementary material for: Ranging Behaviour of Verreaux’s Eagles during the Pre-Breeding Period Determined through the Use of High Temporal Resolution Tracking
Source: PLoS One. 2016 Oct 10;11(10):e0163378. doi: 10.1371/journal.pone.0163378 (PMC5056708; doi:10.1371/journal.pone.0163378)
Supplement: S2 Data — (XLSX) [file pone.0163378.s002.xlsx]

## Sheet: habpref data PLOS.csv
bin	nest_distance	eagle_id	hab_cond	terrain_ruggedness	slope	altitude	hillshade
1	0.788	726	Natural	45.25	32.98	218	179
1	0.454	726	Natural	34	18.92	242	123
1	0.076	726	Natural	40	32.57	195	146
1	0.081	726	Natural	40	32.57	195	146
1	0.085	726	Natural	40	32.57	195	146
1	0.08	726	Natural	40	32.57	195	146
1	0.079	726	Natural	40	32.57	195	146
1	0.083	726	Natural	40	32.57	195	146
1	0.081	726	Natural	40	32.57	195	146
1	0.08	726	Natural	40	32.57	195	146
1	0.079	726	Natural	40	32.57	195	146
1	0.041	726	Natural	44.13	34.97	249	143
1	0.103	726	Natural	40	32.57	195	146
1	0.074	726	Natural	40	32.57	195	146
1	0.079	726	Natural	40	32.57	195	146
1	0.08	726	Natural	40	32.57	195	146
1	0.08	726	Natural	40	32.57	195	146
1	0.077	726	Natural	40	32.57	195	146
1	0.075	726	Natural	40	32.57	195	146
1	0.079	726	Natural	40	32.57	195	146
1	0.08	726	Natural	40	32.57	195	146
1	0.083	726	Natural	40	32.57	195	146
1	0.475	726	Natural	48.38	36.06	187	164
1	0.36	726	No Natural Habitat	11	9.35	125	184
1	2.437	726	Natural	6	4.7	133	183
1	3.471	726	No Natural Habitat	4.13	2.39	71	186
1	1.859	726	Natural	11	9.35	165	177
1	0.85	726	Natural	45.25	32.98	218	179
1	0.533	726	No Natural Habitat	4	2.99	105	185
1	0.705	726	Natural	49.13	34.71	240	175
1	0.052	726	Natural	40	32.57	195	146
1	0.076	726	Natural	40	32.57	195	146
1	0.077	726	Natural	40	32.57	195	146
1	0.079	726	Natural	40	32.57	195	146
1	0.078	726	Natural	40	32.57	195	146
1	0.078	726	Natural	40	32.57	195	146
1	0.076	726	Natural	40	32.57	195	146
1	0.428	726	No Natural Habitat	6	5.25	111	178
1	0.228	726	Natural	28.75	23.72	158	174
1	0.066	726	Natural	40	32.57	195	146
1	0.076	726	Natural	40	32.57	195	146
1	1.258	726	No Natural Habitat	2	1.54	81	180
1	0.856	726	Natural	8.38	6.64	154	167
1	0.694	726	No Natural Habitat	2.63	2.12	97	182
1	1.631	726	No Natural Habitat	1.88	1.46	83	182
1	2.802	726	No Natural Habitat	3.63	2.99	173	186
1	3.531	726	Degraded	2.25	1.7	215	185
1	4.565	726	Degraded	3.88	3.46	177	176
1	4.151	726	Natural	3.88	3.47	204	173
1	5.174	726	Degraded	3.63	3.19	157	173
1	6.84	726	Natural	2.5	1.83	161	182
1	7.073	726	Natural	2.5	1.99	160	176
1	8.459	726	Natural	4.38	3.89	178	189
1	10.446	726	No Natural Habitat	0.5	0.34	179	181
1	10.139	726	No Natural Habitat	2.63	0.7	172	181
1	9.988	726	Natural	5.63	4.99	182	195
1	10.105	726	Natural	9.13	7.52	185	193
1	11.122	726	Degraded	5.25	4.23	239	182
1	12.75	726	Degraded	4.25	2.9	250	181
1	13.58	726	Degraded	3.38	2.74	263	184
1	13.823	726	Natural	5.63	4.56	271	187
1	15.521	726	No Natural Habitat	0.63	0.47	211	181
1	16.054	726	Near Natural	1.25	0.7	210	181
1	14.483	726	Degraded	1.38	1.13	220	183
1	14.504	726	No Natural Habitat	1.38	1.22	208	184
1	12.812	726	No Natural Habitat	1.88	1.01	222	183
1	11.47	726	Degraded	2.5	2.13	221	187
1	9.727	726	No Natural Habitat	0.63	0.58	182	181
1	7.453	726	Degraded	0.63	0.34	180	181
1	8.108	726	No Natural Habitat	1.38	0.25	172	181
1	9.466	726	Natural	1.13	0.27	163	181
1	10.073	726	Near Natural	1.13	0.34	160	180
1	11.807	726	Degraded	1.75	1.42	164	185
1	10.666	726	Degraded	0.88	0.47	154	181
1	10.382	726	No Natural Habitat	2	1.61	150	184
1	10.336	726	Degraded	1.13	0.72	151	180
1	9.642	726	Degraded	0.88	0.72	155	179
1	9.663	726	No Natural Habitat	1.25	0.9	154	182
1	9.674	726	No Natural Habitat	1.75	0.77	149	182
1	8.385	726	Degraded	1.13	0.7	153	183
1	5.298	726	No Natural Habitat	3.38	2.64	150	175
1	5.224	726	Natural	4.5	3.66	143	172
1	5.446	726	Natural	3.25	2.7	154	181
1	4.946	726	No Natural Habitat	3	2.45	156	184
1	5.753	726	Degraded	1	0.75	172	183
1	5.986	726	Degraded	0.88	0.34	167	181
1	4.543	726	No Natural Habitat	1.13	0.58	129	179
1	4.426	726	No Natural Habitat	3	2.67	111	180
1	5.363	726	No Natural Habitat	3.13	2.64	150	173
1	5.728	726	No Natural Habitat	1.5	1.12	160	179
1	6.837	726	No Natural Habitat	1.25	0.34	154	181
1	7.133	726	Degraded	1.25	0.97	154	181
1	7.423	726	Degraded	1.38	0.8	150	182
1	5.006	726	No Natural Habitat	3.88	3.1	133	175
1	4.644	726	Natural	1.75	1.18	146	183
1	5.828	726	Degraded	0.63	0.36	190	182
1	7.906	726	Natural	0.88	0.34	183	181
1	9.977	726	Degraded	0.88	0.61	192	180
1	10.405	726	Degraded	1.38	1.06	206	184
1	10.645	726	Degraded	1.5	1.12	209	184
1	11.65	726	Natural	8	6.68	210	165
1	11.049	726	Near Natural	9	7.7	221	165
1	9.329	726	Natural	9.88	7.73	188	199
1	6.046	726	No Natural Habitat	1.75	1.28	149	181
1	3.682	726	Natural	3.63	2.95	192	178
1	3.643	726	Natural	4.38	3.94	205	185
1	3.723	726	Natural	3.25	2.67	204	180
1	3.114	726	Natural	6.88	2.71	206	187
1	3.117	726	Natural	6.88	2.71	206	187
1	3.119	726	Natural	6.88	2.71	206	187
1	3.051	726	No Natural Habitat	7.63	6.85	189	185
1	3.216	726	Natural	3	1.8	197	182
1	3.229	726	No Natural Habitat	4.5	3.19	166	189
1	4.864	726	No Natural Habitat	2	1.27	142	184
1	5.636	726	No Natural Habitat	2.5	2.03	156	174
1	7.924	726	Degraded	1.5	1.17	149	182
1	9.619	726	Degraded	2.63	0.75	146	183
1	10.395	726	Degraded	1.63	0.47	145	182
1	10.424	726	No Natural Habitat	1.63	0.25	149	181
1	10.645	726	No Natural Habitat	2	0.59	146	179
1	8.923	726	No Natural Habitat	0.88	0.75	156	183
1	8.545	726	No Natural Habitat	1	0.94	157	180
1	8.821	726	No Natural Habitat	0.63	0.64	157	182
1	7.526	726	Degraded	1.5	1.06	154	181
1	5.405	726	No Natural Habitat	2.13	1.73	153	175
1	3.512	726	No Natural Habitat	2.5	2.07	124	183
1	3.018	726	No Natural Habitat	2.63	2.21	115	180
1	3.648	726	No Natural Habitat	4.13	3.03	137	183
1	2.029	726	No Natural Habitat	3.75	2.96	90	187
1	2.802	726	Natural	4.63	3.82	175	188
1	2.88	726	Natural	6.38	5.07	143	185
1	2.574	726	Natural	12.25	10.71	143	180
1	2.832	726	Natural	5.88	5.35	142	181
1	2.609	726	Natural	9.5	8.3	152	177
1	2.777	726	Natural	4.75	4.3	173	188
1	3.314	726	Natural	4.13	3.44	204	186
1	2.389	726	Natural	7.75	6.31	151	188
1	3.07	726	No Natural Habitat	6.38	5.52	164	185
1	3.327	726	Natural	6.5	5.65	174	182
1	4.118	726	Natural	5.5	4.66	201	172
1	6.715	726	Degraded	1.75	1.31	165	177
1	7.321	726	Natural	2	1.46	164	177
1	8.854	726	Natural	2.5	2.24	165	183
1	9.253	726	No Natural Habitat	1.63	1.31	178	180
1	8.264	726	Natural	7.13	2.19	169	175
1	7.393	726	Natural	3	2.36	153	173
1	6.596	726	No Natural Habitat	3.38	2.57	132	174
1	6.514	726	Natural	5.38	3.48	129	174
1	6.811	726	No Natural Habitat	3	2.55	113	180
1	3.958	726	Natural	10	7.65	180	175
1	2.593	726	No Natural Habitat	1.13	0.36	90	181
1	0.409	726	Natural	13.88	4.63	270	166
1	0.789	726	Natural	45.25	32.98	218	179
1	0.79	726	Natural	45.25	32.98	218	179
1	0.788	726	Natural	45.25	32.98	218	179
1	0.789	726	Natural	45.25	32.98	218	179
1	0.789	726	Natural	45.25	32.98	218	179
1	0.793	726	Natural	45.25	32.98	218	179
1	0.792	726	Natural	45.25	32.98	218	179
1	0.788	726	Natural	45.25	32.98	218	179
1	0.793	726	Natural	45.25	32.98	218	179
1	0.795	726	Natural	45.25	32.98	218	179
1	0.785	726	Natural	38.13	28.95	185	176
1	0.796	726	Natural	45.25	32.98	218	179
1	0.063	726	Natural	41.13	33.29	194	152
1	0.112	726	Natural	40	32.57	195	146
1	0.111	726	Natural	40	32.57	195	146
1	0.111	726	Natural	40	32.57	195	146
1	0.114	726	Natural	40	32.57	195	146
1	0.113	726	Natural	40	32.57	195	146
1	0.114	726	Natural	40	32.57	195	146
1	0.114	726	Natural	40	32.57	195	146
1	0.11	726	Natural	40	32.57	195	146
1	0.492	726	Natural	34	18.92	242	123
1	0.914	726	Natural	6.63	5.07	301	170
1	1.561	726	No Natural Habitat	10.38	8.61	242	165
1	1.654	726	No Natural Habitat	7.88	6.46	222	170
1	1.381	726	Natural	14.75	11.63	278	156
1	2.302	726	Natural	9.5	7.85	126	179
1	2.685	726	Natural	9	8.09	153	180
1	3.145	726	Natural	8	6.44	158	190
1	2.511	726	Natural	12.25	10.71	143	180
1	3.256	726	No Natural Habitat	4.38	3.78	198	185
1	2.549	726	No Natural Habitat	6.25	5.35	138	189
1	2.127	726	Natural	7.5	6.09	119	188
1	2.503	726	Natural	12.25	10.71	143	180
1	2.447	726	Natural	13.88	11.47	122	185
1	2.223	726	Natural	6.63	5.83	117	183
1	0.79	726	No Natural Habitat	6.88	5.67	107	177
1	0.176	726	Natural	17.5	15.85	142	173
1	0.129	726	Natural	40	32.57	195	146
1	0.142	726	Natural	26.75	23.42	162	162
1	0.141	726	Natural	26.75	23.42	162	162
1	0.141	726	Natural	26.75	23.42	162	162
1	0.145	726	Natural	26.75	23.42	162	162
1	0.145	726	Natural	26.75	23.42	162	162
1	0.143	726	Natural	26.75	23.42	162	162
1	0.139	726	Natural	26.75	23.42	162	162
1	0.132	726	Natural	40	32.57	195	146
1	0.132	726	Natural	26.75	23.42	162	162
1	0.136	726	Natural	40	32.57	195	146
1	0.291	726	Natural	17.63	13.42	290	153
1	0.788	726	Natural	45.25	32.98	218	179
1	0.796	726	Natural	39.5	29.3	280	182
1	0.786	726	Natural	45.25	32.98	218	179
1	0.79	726	Natural	45.25	32.98	218	179
1	0.517	726	Natural	55.88	38.55	237	168
1	0.516	726	Natural	55.88	38.55	237	168
1	0.517	726	Natural	55.88	38.55	237	168
1	0.517	726	Natural	55.88	38.55	237	168
1	0.515	726	Natural	55.88	38.55	237	168
1	0.517	726	Natural	55.88	38.55	237	168
1	0.518	726	Natural	55.88	38.55	237	168
1	0.517	726	Natural	55.88	38.55	237	168
1	0.516	726	Natural	55.88	38.55	237	168
1	0.516	726	Natural	55.88	38.55	237	168
1	0.465	726	Natural	48.38	36.06	187	164
1	0.488	726	Natural	48.38	36.06	187	164
1	1.776	726	No Natural Habitat	1.75	1.43	84	181
1	2.094	726	Natural	5.88	5.05	105	186
1	2.611	726	Natural	8.25	7.52	142	180
1	2.529	726	Natural	12.25	10.71	143	180
1	0.1	726	Natural	40	32.57	195	146
1	0.102	726	Natural	40	32.57	195	146
1	0.103	726	Natural	40	32.57	195	146
1	0.099	726	Natural	40	32.57	195	146
1	0.102	726	Natural	40	32.57	195	146
1	0.098	726	Natural	40	32.57	195	146
1	0.097	726	Natural	40	32.57	195	146
1	0.104	726	Natural	40	32.57	195	146
1	0.099	726	Natural	40	32.57	195	146
1	0.098	726	Natural	40	32.57	195	146
1	0.1	726	Natural	40	32.57	195	146
1	0.096	726	Natural	40	32.57	195	146
1	0.014	726	Natural	44.13	34.97	249	143
1	0.821	726	Natural	7.25	6.37	271	175
1	1.295	726	Natural	10.5	9.21	199	175
1	1.218	726	Natural	12.63	10.78	242	183
1	1.597	726	Natural	8.88	7.35	202	169
1	2.518	726	Natural	3	2.55	161	180
1	3.837	726	No Natural Habitat	3.88	2.89	148	184
1	4.415	726	No Natural Habitat	3.75	3.19	168	183
1	4.99	726	Natural	2.88	2.31	185	183
1	5.105	726	Degraded	3.38	2.64	199	185
1	6.2	726	Natural	3.38	2.58	286	184
1	6.669	726	Near Natural	2.25	1.83	280	178
1	6.759	726	Degraded	3.63	3.22	255	173
1	7.13	726	Degraded	2.13	1.7	263	179
1	6.554	726	Degraded	2	1.6	242	176
1	5.481	726	Natural	5.25	4.44	244	182
1	5.683	726	Natural	2.63	0.35	263	182
1	3.697	726	Natural	2.5	2.21	140	180
1	2.565	726	No Natural Habitat	4.75	3.75	150	175
1	3.199	726	No Natural Habitat	1.13	0.93	127	180
1	2.299	726	Degraded	6.13	5.11	196	178
1	0.979	726	Degraded	10.63	8.96	307	195
1	0.795	726	Natural	45.25	32.98	218	179
1	0.785	726	Natural	38.13	28.95	185	176
1	1.306	726	Natural	14.38	9.01	199	160
1	0.955	726	Natural	41.75	30.16	249	195
1	0.466	726	Natural	48.38	36.06	187	164
1	0.466	726	Natural	48.38	36.06	187	164
1	0.077	726	Natural	40	32.57	195	146
1	0.088	726	Natural	40	32.57	195	146
1	0.081	726	Natural	40	32.57	195	146
1	0.08	726	Natural	40	32.57	195	146
1	2.041	726	Natural	20.63	16.72	239	189
1	1.974	726	Natural	18.38	15.19	223	184
1	2.003	726	Natural	19.75	15.62	271	189
1	0.25	726	Natural	47.25	34.96	294	169
1	0.979	726	No Natural Habitat	5.13	1.13	78	178
1	1.433	726	Natural	19.5	16.59	167	183
1	0.065	726	Natural	40	32.57	195	146
1	0.08	726	Natural	40	32.57	195	146
1	0.082	726	Natural	40	32.57	195	146
1	0.084	726	Natural	40	32.57	195	146
1	0.348	726	Natural	37.38	19.01	278	138
1	1.266	726	No Natural Habitat	0.88	0.47	83	180
1	1.666	726	No Natural Habitat	1.5	0.34	85	181
1	0.974	726	No Natural Habitat	5.88	4.92	116	183
1	1.218	726	Natural	7.63	6.43	115	177
1	1.578	726	No Natural Habitat	1.88	0.75	86	181
1	0.08	726	Natural	40	32.57	195	146
1	0.082	726	Natural	40	32.57	195	146
1	1.203	726	Near Natural	8.13	7.16	149	180
1	2.239	726	Near Natural	1.75	1.16	79	180
1	2.331	726	No Natural Habitat	1.13	0.75	77	183
1	3.54	726	No Natural Habitat	4.75	3.26	128	181
1	4.751	726	No Natural Habitat	1.75	1.33	142	184
1	6.004	726	No Natural Habitat	2	0.56	161	180
1	5.92	726	No Natural Habitat	1.25	0.7	162	182
1	6.724	726	Degraded	1	0.6	163	182
1	9.115	726	Near Natural	1	0.81	155	181
1	9.222	726	No Natural Habitat	1.88	0.76	155	183
1	8.758	726	Near Natural	1.5	1.28	155	185
1	9.097	726	No Natural Habitat	1.75	1.13	155	183
1	10.002	726	Degraded	1.25	0.7	162	181
1	10.673	726	Natural	2.13	1.39	168	182
1	10.697	726	Natural	2.25	1.54	189	181
1	11.431	726	Degraded	1.25	0.7	216	178
1	10.874	726	Degraded	3.38	2.98	208	184
1	9.798	726	No Natural Habitat	0.63	0.53	180	182
1	8.613	726	Natural	1.25	0.17	178	181
1	6.576	726	Degraded	0.5	0.56	179	180
1	6.801	726	Degraded	1.25	0.37	180	180
1	6.805	726	Degraded	1.25	0.37	180	180
1	6.5	726	Degraded	1.38	0.77	177	179
1	6.502	726	Degraded	1.38	0.77	177	179
1	6.697	726	Degraded	0.75	0.37	177	182
1	6.3	726	Degraded	1.25	0.51	177	179
1	6.634	726	Degraded	1.38	0.88	178	179
1	6.302	726	Degraded	1.63	0.61	174	180
1	7.646	726	Natural	3.88	3.51	139	169
1	7.986	726	Natural	4	3.36	128	184
1	7.822	726	Natural	2.5	1.17	127	177
1	9.584	726	Natural	8	6.58	170	174
1	11.357	726	No Natural Habitat	6.5	5.22	205	171
1	10.802	726	No Natural Habitat	1.75	1.42	171	184
1	11.129	726	No Natural Habitat	6.88	5.57	200	171
1	8.967	726	Natural	5.5	4.43	190	175
1	10.013	726	Natural	8.25	6.69	172	193
1	10.132	726	No Natural Habitat	10.88	8.64	228	178
1	10.663	726	Natural	13.63	11.18	262	153
1	8.831	726	Natural	4	1.55	150	185
1	6.156	726	Degraded	1	0.51	177	182
1	4.743	726	Natural	1.75	1.05	197	181
1	5.858	726	Natural	1.25	0.7	165	183
1	7.984	726	Degraded	1.13	0.71	156	178
1	7.712	726	Natural	1.13	0.64	149	182
1	7.433	726	Degraded	0.88	0.64	143	182
1	8.612	726	No Natural Habitat	1.38	0.12	111	181
1	7.097	726	Natural	4.5	3.9	119	188
1	8.043	726	No Natural Habitat	1.13	0.12	141	181
1	8.564	726	Degraded	0.75	0.7	152	183
1	7.1	726	Degraded	1.13	0.71	162	181
1	4.599	726	No Natural Habitat	2.5	0.75	128	183
1	3.119	726	Near Natural	6.25	5.45	87	181
1	1.54	726	Natural	21.63	18.38	244	173
1	1.535	726	Natural	21.63	18.38	244	173
1	1.488	726	Natural	13	8.94	214	198
1	2.988	726	Natural	20.88	17.86	304	172
1	1.498	726	Natural	21.63	18.38	244	173
1	1.161	726	Natural	6.5	5.51	126	177
1	0.758	726	No Natural Habitat	6.38	5.22	129	186
1	0.073	726	Natural	40	32.57	195	146
1	0.068	726	Natural	40	32.57	195	146
1	0.02	726	Natural	44.13	34.97	249	143
1	0.036	726	Natural	44.13	34.97	249	143
1	0.06	726	Natural	40	32.57	195	146
1	0.077	726	Natural	40	32.57	195	146
1	0.073	726	Natural	40	32.57	195	146
1	0.076	726	Natural	40	32.57	195	146
1	0.076	726	Natural	40	32.57	195	146
1	0.083	726	Natural	40	32.57	195	146
1	0.08	726	Natural	40	32.57	195	146
1	0.078	726	Natural	40	32.57	195	146
1	0.079	726	Natural	40	32.57	195	146
1	0.084	726	Natural	40	32.57	195	146
1	0.079	726	Natural	40	32.57	195	146
1	1.207	726	No Natural Habitat	0.88	0.7	82	180
1	2.403	726	No Natural Habitat	5.75	4.82	130	193
1	2.201	726	No Natural Habitat	4.5	3.31	121	189
1	3.188	726	Natural	2.13	0.6	200	182
1	3.677	726	No Natural Habitat	4.13	3.3	179	189
1	4.621	726	No Natural Habitat	3.25	2.88	193	182
1	3.912	726	No Natural Habitat	1.88	1.06	174	184
1	1.867	726	No Natural Habitat	1.38	0.75	85	178
1	0.46	726	No Natural Habitat	4.5	3.68	111	188
1	0.562	726	No Natural Habitat	5.13	4.05	122	178
1	0.953	726	Natural	30.13	23.5	188	187
1	1.215	726	Natural	21.75	17.59	210	170
1	0.398	726	Natural	33.88	26.86	164	176
1	0.467	726	Natural	56.25	38.89	267	162
1	0.467	726	Natural	56.25	38.89	267	162
1	0.465	726	Natural	48.38	36.06	187	164
1	0.466	726	Natural	56.25	38.89	267	162
1	0.475	726	Natural	48.38	36.06	187	164
1	0.472	726	Natural	48.38	36.06	187	164
1	0.34	726	Natural	36.5	30.09	190	144
1	0.677	726	No Natural Habitat	6	4.78	133	188
1	0.551	726	Natural	17.88	14.82	251	171
1	1.273	726	Natural	10.38	8.27	253	170
1	4.047	726	No Natural Habitat	2.88	2.42	153	183
1	4.031	726	No Natural Habitat	2.75	2.06	149	182
1	3.176	726	No Natural Habitat	0.75	0.27	133	181
1	2.778	726	No Natural Habitat	2.88	2.44	138	176
1	2.338	726	No Natural Habitat	5.88	5.05	160	177
1	2.352	726	No Natural Habitat	6.25	5.19	158	176
1	1.896	726	No Natural Habitat	7	5.66	201	172
1	1.634	726	No Natural Habitat	7	5.71	216	171
1	0.99	726	Natural	7.5	6.01	291	171
1	0.292	726	Natural	14.75	11.84	315	157
1	0.198	726	Natural	18.13	12.1	303	149
1	1.411	726	No Natural Habitat	1.38	0.87	86	178
1	2.053	726	No Natural Habitat	7	6.25	113	188
1	2.282	726	Natural	5.5	4.82	137	190
1	2.579	726	Natural	5.13	4.11	161	184
1	2.447	726	Natural	10	8.11	122	191
1	2.521	726	Natural	12.25	10.71	143	180
1	2.519	726	Natural	12.25	10.71	143	180
1	2.521	726	Natural	12.25	10.71	143	180
1	2.515	726	Natural	12.25	10.71	143	180
1	2.514	726	Natural	12.25	10.71	143	180
1	2.518	726	Natural	12.25	10.71	143	180
1	2.516	726	Natural	12.25	10.71	143	180
1	2.516	726	Natural	12.25	10.71	143	180
1	2.515	726	Natural	12.25	10.71	143	180
1	2.516	726	Natural	12.25	10.71	143	180
1	2.519	726	Natural	12.25	10.71	143	180
1	2.512	726	Natural	12.25	10.71	143	180
1	2.528	726	Natural	12.25	10.71	143	180
1	2.761	726	Natural	10.13	9.16	123	181
1	2.517	726	Natural	10.25	8.35	133	183
1	2.361	726	Natural	13.88	11.59	119	178
1	2.509	726	Natural	12.25	10.71	143	180
1	2.606	726	Natural	9.5	8.3	152	177
1	2.537	726	Natural	10.38	8.98	155	177
1	2.469	726	Natural	13.88	11.47	122	185
1	2.214	726	No Natural Habitat	5.38	4.76	103	180
1	2.466	726	Natural	13.88	11.47	122	185
1	2.236	726	Natural	6.63	5.83	117	183
1	0.522	726	No Natural Habitat	4.25	3.51	102	186
1	1.753	726	Near Natural	2.38	1.99	90	184
1	2.301	726	Natural	6.5	5.23	115	176
1	2.386	726	Natural	13.88	11.59	119	178
1	2.5	726	Natural	12.25	10.71	143	180
1	2.497	726	Natural	12.25	10.71	143	180
1	2.415	726	Natural	13.75	11.39	140	185
1	2.415	726	Natural	13.75	11.39	140	185
1	2.287	726	Natural	9.5	7.85	126	179
1	0.33	726	No Natural Habitat	4.88	3.86	119	184
1	0.403	726	Natural	33.88	26.86	164	176
1	0.199	726	Natural	38	31.34	190	148
1	0.153	726	Natural	26.75	23.42	162	162
1	0.447	726	Natural	34	18.92	242	123
1	0.303	726	Natural	9.5	6.68	327	167
1	0.475	726	Natural	48.38	36.06	187	164
1	0.078	726	Natural	40	32.57	195	146
1	0.082	726	Natural	40	32.57	195	146
1	0.075	726	Natural	40	32.57	195	146
1	0.047	726	Natural	40	32.57	195	146
1	0.046	726	Natural	40	32.57	195	146
1	0.065	726	Natural	40	32.57	195	146
1	0.072	726	Natural	40	32.57	195	146
1	0.026	726	Natural	44.13	34.97	249	143
1	0.046	726	Natural	40	32.57	195	146
1	0.059	726	Natural	40	32.57	195	146
1	0.08	726	Natural	40	32.57	195	146
1	0.094	726	Natural	40	32.57	195	146
1	0.08	726	Natural	40	32.57	195	146
1	0.075	726	Natural	40	32.57	195	146
1	0.083	726	Natural	40	32.57	195	146
1	0.078	726	Natural	40	32.57	195	146
1	0.078	726	Natural	40	32.57	195	146
1	0.078	726	Natural	40	32.57	195	146
1	0.08	726	Natural	40	32.57	195	146
1	0.075	726	Natural	40	32.57	195	146
1	0.079	726	Natural	40	32.57	195	146
1	0.079	726	Natural	40	32.57	195	146
1	0.086	726	Natural	40	32.57	195	146
1	0.082	726	Natural	40	32.57	195	146
1	0.095	726	Natural	40	32.57	195	146
1	0.568	726	Natural	39.13	30.63	176	174
1	0.647	726	Natural	48.13	34.83	205	177
1	0.61	726	Natural	47.25	33.44	278	184
1	0.547	726	Natural	21.25	17.1	316	195
1	0.095	726	Natural	47.5	37.35	245	140
1	0.276	726	Natural	47.25	34.96	294	169
1	0.275	726	Natural	47.25	34.96	294	169
1	0.118	726	Natural	47.5	37.35	245	140
1	0.431	726	Natural	48.38	36.06	187	164
1	0.327	726	Natural	47.25	34.96	294	169
1	0.609	726	Natural	11.5	9.81	283	169
1	3.019	726	Natural	0.88	0.49	137	179
1	5.14	726	Degraded	4.13	3.26	209	186
1	5.434	726	Degraded	4.75	3.91	221	188
1	5.986	726	Degraded	4.5	3.48	255	187
1	6.338	726	Degraded	3.5	2.48	264	185
1	7.13	726	Degraded	5	4.29	255	179
1	6.009	726	Near Natural	2.63	2.4	271	178
1	5.823	726	Natural	2.88	2.39	222	184
1	6.132	726	Natural	11.63	9.79	220	171
1	6.131	726	Natural	11.63	9.79	220	171
1	6.142	726	Natural	11.63	9.79	220	171
1	6.132	726	Natural	11.63	9.79	220	171
1	6.119	726	Natural	11.63	9.79	220	171
1	6.123	726	Natural	11.63	9.79	220	171
1	6.095	726	Natural	8.75	7.58	215	172
1	5.93	726	Natural	6	4.99	199	184
1	6.133	726	Natural	11.63	9.79	220	171
1	6.13	726	Natural	11.63	9.79	220	171
1	6.144	726	Natural	11.63	9.79	220	171
1	6.164	726	Natural	9.25	7.32	239	177
1	6.044	726	Natural	7.25	6.4	211	178
1	6.003	726	Natural	5.88	5.21	197	180
1	5.941	726	Natural	3.25	2.91	205	178
1	6.14	726	Natural	11.63	9.79	220	171
1	6.143	726	Natural	11.63	9.79	220	171
1	5.937	726	Natural	3.25	2.91	205	178
1	5.771	726	Natural	4.13	3.28	203	184
1	2.466	726	Degraded	6.13	5.32	187	179
1	0.854	726	Natural	5.13	4.41	323	174
1	2.248	726	No Natural Habitat	2.25	1.87	112	185
1	3.694	726	No Natural Habitat	2.13	1.82	157	185
1	3.983	726	No Natural Habitat	1.75	1.44	165	182
1	4.719	726	No Natural Habitat	2.13	1.97	156	186
1	7.383	726	Degraded	1.63	1.5	158	185
1	7.962	726	Degraded	0.88	0.27	151	181
1	8.756	726	No Natural Habitat	1.25	0.48	135	180
1	9.387	726	No Natural Habitat	1.63	1.17	145	182
1	8.584	726	Degraded	0.75	0.7	152	183
1	5.601	726	No Natural Habitat	2.75	2.45	154	178
1	4.419	726	No Natural Habitat	3.38	1.53	133	184
1	0.76	726	Natural	5.5	4.43	110	179
1	0.193	726	Natural	44.13	34.32	190	152
1	0.796	726	Natural	45.25	32.98	218	179
1	0.808	726	Natural	45.25	32.98	218	179
1	0.826	726	Natural	45.25	32.98	218	179
1	0.811	726	Natural	45.25	32.98	218	179
1	0.819	726	Natural	45.25	32.98	218	179
1	0.79	726	Natural	45.25	32.98	218	179
1	0.801	726	Natural	45.25	32.98	218	179
1	0.558	726	Natural	4.13	2.54	324	187
1	1.13	726	Natural	16.63	12.8	193	180
1	1.023	726	Degraded	3.13	2.73	328	178
1	3.622	726	Natural	0.88	0.59	121	181
1	6.481	726	Natural	2.88	2.63	248	179
1	6.49	726	Natural	2.88	2.63	248	179
1	6.521	726	Natural	2.38	2.03	249	179
1	6.55	726	Natural	2.38	2.03	249	179
1	6.521	726	Natural	2.38	2.03	249	179
1	6.522	726	Natural	2.38	2.03	249	179
1	6.543	726	Natural	2.38	2.03	249	179
1	6.55	726	Natural	2.38	2.03	249	179
1	6.521	726	Natural	2.38	2.03	249	179
1	6.522	726	Natural	2.38	2.03	249	179
1	6.527	726	Natural	2.38	2.03	249	179
1	6.52	726	Natural	2.38	2.03	249	179
1	6.52	726	Natural	2.38	2.03	249	179
1	6.523	726	Natural	2.38	2.03	249	179
1	6.522	726	Natural	2.38	2.03	249	179
1	6.541	726	Natural	2.38	2.03	249	179
1	6.532	726	Natural	2.38	2.03	249	179
1	6.524	726	Natural	2.38	2.03	249	179
1	6.516	726	Natural	2.88	2.63	248	179
1	6.52	726	Natural	2.38	2.03	249	179
1	5.771	726	Natural	4.5	3.83	202	181
1	4.275	726	Natural	3.88	3.29	143	187
1	2.439	726	Degraded	6.13	5.32	187	179
1	1.999	726	Degraded	9.13	7.96	233	177
1	0.465	726	Natural	48.38	36.06	187	164
1	2.084	726	No Natural Habitat	2.75	2.35	113	180
1	2.607	726	Natural	2.25	1.73	77	183
1	0.382	726	Natural	56	38.83	207	166
1	0.51	726	Natural	27.88	22.48	154	177
1	0.265	726	No Natural Habitat	11.88	10.22	130	179
1	2.025	726	No Natural Habitat	7.38	6.25	111	188
1	2.514	726	Natural	12.25	10.71	143	180
1	2.704	726	Natural	3.75	3.23	170	187
1	1.774	726	Natural	2.38	1.99	90	184
1	0.451	726	Natural	48.38	36.06	187	164
1	0.517	726	Natural	55.88	38.55	237	168
1	0.517	726	Natural	55.88	38.55	237	168
1	0.518	726	Natural	55.88	38.55	237	168
1	0.518	726	Natural	55.88	38.55	237	168
1	0.517	726	Natural	55.88	38.55	237	168
1	0.518	726	Natural	55.88	38.55	237	168
1	0.518	726	Natural	55.88	38.55	237	168
1	0.517	726	Natural	55.88	38.55	237	168
1	0.518	726	Natural	55.88	38.55	237	168
1	0.518	726	Natural	55.88	38.55	237	168
1	0.519	726	Natural	55.88	38.55	237	168
1	0.517	726	Natural	55.88	38.55	237	168
1	0.515	726	Natural	55.88	38.55	237	168
1	0.517	726	Natural	55.88	38.55	237	168
1	0.518	726	Natural	55.88	38.55	237	168
1	0.518	726	Natural	55.88	38.55	237	168
1	0.516	726	Natural	55.88	38.55	237	168
1	0.518	726	Natural	55.88	38.55	237	168
1	0.518	726	Natural	55.88	38.55	237	168
1	0.407	726	Natural	56.25	38.89	267	162
1	0.397	726	Natural	56	38.83	207	166
1	0.407	726	Natural	56.25	38.89	267	162
1	0.406	726	Natural	56.25	38.89	267	162
1	0.405	726	Natural	56.25	38.89	267	162
1	0.406	726	Natural	56.25	38.89	267	162
1	0.406	726	Natural	56.25	38.89	267	162
1	0.408	726	Natural	56.25	38.89	267	162
1	0.408	726	Natural	56.25	38.89	267	162
1	0.408	726	Natural	56.25	38.89	267	162
1	0.406	726	Natural	56.25	38.89	267	162
1	0.405	726	Natural	56.25	38.89	267	162
1	0.41	726	Natural	56.25	38.89	267	162
1	0.408	726	Natural	56.25	38.89	267	162
1	0.407	726	Natural	56.25	38.89	267	162
1	0.032	726	Natural	44.13	34.97	249	143
1	0.071	726	Natural	40	32.57	195	146
1	0.072	726	Natural	40	32.57	195	146
1	0.467	726	Natural	48.38	36.06	187	164
1	0.074	726	Natural	40	32.57	195	146
1	0.069	726	Natural	40	32.57	195	146
1	0.077	726	Natural	40	32.57	195	146
1	0.045	726	Natural	44.13	34.97	249	143
1	0.069	726	Natural	40	32.57	195	146
1	0.051	726	Natural	44.13	34.97	249	143
1	0.065	726	Natural	40	32.57	195	146
1	0.058	726	Natural	34.75	28.1	296	150
1	0.047	726	Natural	44.13	34.97	249	143
1	0.111	726	Natural	40	32.57	195	146
1	0.073	726	Natural	40	32.57	195	146
1	0.077	726	Natural	40	32.57	195	146
1	0.481	726	Natural	48.38	36.06	187	164
1	0.059	726	Natural	40	32.57	195	146
1	1.56	726	Natural	9.25	8.06	141	172
1	0.464	726	Natural	56.25	38.89	267	162
1	0.48	726	Natural	55.88	38.55	237	168
1	0.476	726	Natural	55.88	38.55	237	168
1	0.478	726	Natural	55.88	38.55	237	168
1	0.478	726	Natural	55.88	38.55	237	168
1	0.693	726	Natural	49.13	34.71	240	175
1	1.926	726	Natural	9.25	8.22	175	177
1	3.068	726	Near Natural	5	3.51	80	182
1	3.161	726	Near Natural	4.25	3.43	81	179
1	3.16	726	Near Natural	4.25	3.43	81	179
1	3.44	726	No Natural Habitat	2.25	0.6	72	182
1	3.92	726	No Natural Habitat	2.75	2.22	76	186
1	3.791	726	Natural	1.75	1.2	78	178
1	4.664	726	No Natural Habitat	3	2.03	117	179
1	5.009	726	No Natural Habitat	2.88	2.13	137	175
1	5.859	726	No Natural Habitat	2.25	1.89	158	179
1	6.595	726	No Natural Habitat	1.75	1.42	157	185
1	6.444	726	No Natural Habitat	1.5	0.82	157	182
1	6.364	726	No Natural Habitat	2.38	0.82	158	181
1	6.45	726	No Natural Habitat	1.38	0.77	159	182
1	7.678	726	Degraded	0.75	0.25	168	181
1	7.946	726	Degraded	1.38	1.02	161	183
1	8.732	726	Degraded	0.88	0.51	163	182
1	9.121	726	Natural	0.88	0.53	165	180
1	9.098	726	Degraded	1.5	0.12	169	181
1	6.568	726	Degraded	0.88	0.37	177	182
1	7.196	726	Degraded	1.25	0.25	179	181
1	7.718	726	Degraded	1.38	0.77	179	179
1	8.309	726	Degraded	1.75	0.27	179	181
1	10.648	726	Natural	7.63	6.41	288	199
1	11.146	726	Natural	8.88	6.91	279	160
1	11.539	726	Natural	1.88	0.83	283	183
1	10.404	726	Near Natural	7.25	5.89	277	197
1	9.523	726	No Natural Habitat	5.63	4.51	190	183
1	10.152	726	Natural	4.75	3.97	250	191
1	10.774	726	Natural	7	5.57	295	185
1	11.415	726	Degraded	3.88	2.71	274	186
1	10.882	726	Natural	12.63	10.18	229	156
1	10.601	726	Natural	20.5	16.23	241	146
1	10.591	726	Natural	20.5	16.23	241	146
1	10.317	726	Natural	12.38	9.65	214	151
1	10.035	726	No Natural Habitat	7.13	6.79	213	187
1	10.78	726	Natural	9.88	7.94	269	192
1	10.777	726	Natural	9.88	7.94	269	192
1	10.714	726	Natural	10.25	8.32	271	198
1	10.378	726	Near Natural	8.38	6.94	268	198
1	9.898	726	Degraded	6.63	6.51	214	193
1	10.438	726	Natural	8.38	6.68	267	200
1	10.413	726	Natural	7.5	6.51	243	200
1	10.823	726	Natural	9.88	7.94	269	192
1	9.419	726	Natural	4.25	3.72	180	181
1	9.314	726	Natural	4.88	3.83	223	192
1	9.102	726	Natural	3.25	2.89	211	187
1	7.782	726	Near Natural	2	1.7	141	176
1	8.771	726	Natural	3	1.05	161	181
1	9.278	726	Natural	4.25	3.06	158	177
1	10.025	726	Natural	8.25	6.69	172	193
1	11.736	726	Degraded	2.38	1.99	278	187
1	12.096	726	Natural	1.88	1.46	271	183
1	12.622	726	Natural	4.13	3.11	285	187
1	12.425	726	Natural	4	3.34	261	185
1	12.738	726	Near Natural	4.13	3.38	262	182
1	10.991	726	Degraded	1.88	1.82	212	184
1	10.943	726	Natural	3.88	3.08	229	190
1	10.297	726	Near Natural	6.75	5.63	258	194
1	10.444	726	Natural	14.75	12.33	256	150
1	9.276	726	Natural	9.88	7.73	188	199
1	9.796	726	Natural	4.88	4	207	168
1	10.994	726	Natural	14.5	11.48	287	152
1	11.011	726	Natural	14.5	11.48	287	152
1	11.012	726	Natural	14.5	11.48	287	152
1	10.99	726	Natural	14.5	11.48	287	152
1	10.99	726	Natural	14.5	11.48	287	152
1	10.998	726	Natural	14.5	11.48	287	152
1	10.992	726	Natural	14.5	11.48	287	152
1	10.989	726	Natural	14.5	11.48	287	152
1	10.99	726	Natural	14.5	11.48	287	152
1	10.99	726	Natural	14.5	11.48	287	152
1	10.988	726	Natural	14.5	11.48	287	152
1	10.989	726	Natural	14.5	11.48	287	152
1	10.991	726	Natural	14.5	11.48	287	152
1	11.024	726	Natural	4.13	3.48	295	181
1	10.96	726	Natural	9.13	5.32	302	166
1	11.045	726	Natural	14.75	11.75	265	153
1	11.057	726	Natural	14.75	11.75	265	153
1	10.987	726	Natural	14.5	11.48	287	152
1	11.005	726	Natural	14.5	11.48	287	152
1	11.136	726	Near Natural	12.25	10.01	249	159
1	11.048	726	Near Natural	3.25	2.75	175	189
1	11.668	726	Natural	6.38	5.29	220	196
1	11.706	726	Natural	5.5	4.73	233	191
1	8.504	726	No Natural Habitat	4.38	3.74	141	183
1	6.709	726	No Natural Habitat	2.25	1.19	173	182
1	7.095	726	Near Natural	1.88	1.81	167	175
1	7.276	726	No Natural Habitat	2.63	0.86	166	182
1	6.32	726	Degraded	2.25	1.48	174	182
1	5.448	726	Degraded	4.25	3.37	190	180
1	4.044	726	No Natural Habitat	1.5	1.06	183	184
1	2.569	726	No Natural Habitat	5.75	5.02	154	188
1	2.812	726	No Natural Habitat	2.63	2.21	173	186
1	2.63	726	Natural	9.75	8.38	100	182
1	3.442	726	Natural	13	11.45	152	186
1	3.437	726	No Natural Habitat	5.25	4.46	97	182
1	1.346	726	Natural	5.75	5.17	122	178
1	0.474	726	No Natural Habitat	12	11.18	131	167
1	0.243	726	Natural	28.75	23.72	158	174
1	0.44	726	Natural	48.38	36.06	187	164
1	0.465	726	Natural	48.38	36.06	187	164
1	0.463	726	Natural	48.38	36.06	187	164
1	0.464	726	Natural	48.38	36.06	187	164
1	0.463	726	Natural	48.38	36.06	187	164
1	0.465	726	Natural	48.38	36.06	187	164
1	0.467	726	Natural	48.38	36.06	187	164
1	0.477	726	Natural	55.88	38.55	237	168
1	0.479	726	Natural	55.88	38.55	237	168
1	0.473	726	Natural	48.38	36.06	187	164
1	0.478	726	Natural	55.88	38.55	237	168
1	0.478	726	Natural	55.88	38.55	237	168
1	0.477	726	Natural	55.88	38.55	237	168
1	0.472	726	Natural	39.25	29.66	308	179
1	0.474	726	Natural	48.38	36.06	187	164
1	0.482	726	Natural	55.88	38.55	237	168
1	0.474	726	Natural	55.88	38.55	237	168
1	0.467	726	Natural	39.25	29.66	308	179
1	0.47	726	Natural	39.25	29.66	308	179
1	0.478	726	Natural	55.88	38.55	237	168
1	0.473	726	Natural	48.38	36.06	187	164
1	0.472	726	Natural	55.88	38.55	237	168
1	0.474	726	Natural	55.88	38.55	237	168
1	0.474	726	Natural	55.88	38.55	237	168
1	0.476	726	Natural	55.88	38.55	237	168
1	0.475	726	Natural	55.88	38.55	237	168
1	0.473	726	Natural	39.25	29.66	308	179
1	0.472	726	Natural	39.25	29.66	308	179
1	0.473	726	Natural	55.88	38.55	237	168
1	0.476	726	Natural	55.88	38.55	237	168
1	0.474	726	Natural	55.88	38.55	237	168
1	0.475	726	Natural	55.88	38.55	237	168
1	0.477	726	Natural	55.88	38.55	237	168
1	0.406	726	Natural	56.25	38.89	267	162
1	0.403	726	Natural	56.25	38.89	267	162
1	0.405	726	Natural	56.25	38.89	267	162
1	0.405	726	Natural	56.25	38.89	267	162
1	0.408	726	Natural	56.25	38.89	267	162
1	0.405	726	Natural	56.25	38.89	267	162
1	0.408	726	Natural	56.25	38.89	267	162
1	0.404	726	Natural	56.25	38.89	267	162
1	0.407	726	Natural	56.25	38.89	267	162
1	0.407	726	Natural	56.25	38.89	267	162
1	0.404	726	Natural	56.25	38.89	267	162
1	0.415	726	Natural	56.25	38.89	267	162
1	0.411	726	Natural	56.25	38.89	267	162
1	0.401	726	Natural	56.25	38.89	267	162
1	0.42	726	Natural	56.25	38.89	267	162
1	0.407	726	Natural	56.25	38.89	267	162
1	0.417	726	Natural	56.25	38.89	267	162
1	1.097	726	No Natural Habitat	2	0.86	81	180
1	1.079	726	No Natural Habitat	0.88	0.12	81	180
1	1.07	726	No Natural Habitat	0.88	0.12	81	180
1	1.07	726	No Natural Habitat	0.88	0.12	81	180
1	1.07	726	No Natural Habitat	0.88	0.12	81	180
1	1.073	726	No Natural Habitat	0.88	0.12	81	180
1	1.07	726	No Natural Habitat	0.88	0.12	81	180
1	1.07	726	No Natural Habitat	0.88	0.12	81	180
1	1.083	726	No Natural Habitat	1.75	0.48	81	180
1	1.084	726	No Natural Habitat	1.75	0.48	81	180
1	1.088	726	No Natural Habitat	1.75	0.48	81	180
1	1.088	726	No Natural Habitat	1.75	0.48	81	180
1	1.087	726	No Natural Habitat	1.75	0.48	81	180
1	1.088	726	No Natural Habitat	1.75	0.48	81	180
1	1.087	726	No Natural Habitat	1.75	0.48	81	180
1	1.087	726	No Natural Habitat	1.75	0.48	81	180
1	1.086	726	No Natural Habitat	1.75	0.48	81	180
1	1.089	726	No Natural Habitat	1.75	0.48	81	180
1	1.088	726	No Natural Habitat	1.75	0.48	81	180
1	1.088	726	No Natural Habitat	1.75	0.48	81	180
1	0.991	726	Near Natural	3.63	3.1	89	177
1	0.993	726	Near Natural	3.63	3.1	89	177
1	0.995	726	Near Natural	3.63	3.1	89	177
1	1.005	726	Near Natural	2.5	1.72	84	179
1	0.999	726	Near Natural	3.63	3.1	89	177
1	0.991	726	Near Natural	2.5	1.72	84	179
1	0.992	726	Near Natural	3.63	3.1	89	177
1	0.981	726	Near Natural	3.63	3.1	89	177
1	0.996	726	Near Natural	3.63	3.1	89	177
1	0.993	726	Near Natural	3.63	3.1	89	177
1	0.994	726	Near Natural	3.63	3.1	89	177
1	0.994	726	Near Natural	3.63	3.1	89	177
1	0.997	726	Near Natural	3.63	3.1	89	177
1	0.991	726	Near Natural	3.63	3.1	89	177
1	0.995	726	Near Natural	3.63	3.1	89	177
1	0.995	726	Near Natural	3.63	3.1	89	177
1	0.993	726	Near Natural	3.63	3.1	89	177
1	0.997	726	Near Natural	3.63	3.1	89	177
1	0.994	726	Near Natural	3.63	3.1	89	177
1	0.991	726	Near Natural	3.63	3.1	89	177
1	0.993	726	Near Natural	3.63	3.1	89	177
1	0.992	726	Near Natural	3.63	3.1	89	177
1	0.996	726	Near Natural	3.63	3.1	89	177
1	0.995	726	Near Natural	3.63	3.1	89	177
1	0.998	726	Near Natural	3.63	3.1	89	177
1	0.999	726	Near Natural	3.63	3.1	89	177
1	0.803	726	No Natural Habitat	3.88	3.15	94	184
1	0.798	726	No Natural Habitat	3.88	3.15	94	184
1	0.735	726	No Natural Habitat	3.75	3.14	97	181
1	0.733	726	No Natural Habitat	3.75	3.14	97	181
1	0.858	726	No Natural Habitat	4	3.37	96	178
1	0.864	726	No Natural Habitat	4	3.37	96	178
1	0.661	726	No Natural Habitat	6.75	5.38	112	174
1	0.327	726	No Natural Habitat	6	4.07	113	185
1	0.239	726	No Natural Habitat	12.25	10.8	129	176
1	0.188	726	Natural	26.75	23.42	162	162
1	0.215	726	Natural	44.13	34.32	190	152
1	0.075	726	Natural	47.5	37.35	245	140
1	0.08	726	Natural	40	32.57	195	146
1	0.082	726	Natural	40	32.57	195	146
1	0.301	726	Natural	56	38.83	207	166
1	0.788	726	Natural	45.25	32.98	218	179
1	0.79	726	Natural	45.25	32.98	218	179
1	0.797	726	Natural	45.25	32.98	218	179
1	0.8	726	Natural	45.25	32.98	218	179
1	0.05	726	Natural	41.13	33.29	194	152
1	0.141	726	Natural	47.5	37.35	245	140
1	0.138	726	Natural	47.5	37.35	245	140
1	0.145	726	Natural	44.13	34.32	190	152
1	0.143	726	Natural	44.13	34.32	190	152
1	0.156	726	Natural	43	34.05	244	140
1	0.295	726	Natural	41.5	32.29	236	140
1	0.477	726	Natural	34	18.92	242	123
1	0.457	726	Natural	34	18.92	242	123
1	0.456	726	Natural	34	18.92	242	123
1	0.486	726	Natural	34	18.92	242	123
1	0.615	726	Natural	25.5	19.49	142	149
1	0.072	726	Natural	47.5	37.35	245	140
1	0.085	726	Natural	40	32.57	195	146
1	0.103	726	Natural	40	32.57	195	146
1	0.388	726	Natural	56.25	38.89	267	162
1	2.272	726	Natural	6.5	5.23	115	176
1	2.569	726	Natural	10.38	8.98	155	177
1	2.574	726	Natural	10.38	8.98	155	177
1	2.575	726	Natural	10.38	8.98	155	177
1	2.571	726	Natural	10.38	8.98	155	177
1	2.569	726	Natural	10.38	8.98	155	177
1	2.558	726	Natural	10.38	8.98	155	177
1	2.571	726	Natural	10.38	8.98	155	177
1	2.577	726	Natural	10.38	8.98	155	177
1	2.574	726	Natural	10.38	8.98	155	177
1	2.568	726	Natural	10.38	8.98	155	177
1	2.563	726	Natural	10.38	8.98	155	177
1	2.578	726	Natural	10.38	8.98	155	177
1	2.576	726	Natural	10.38	8.98	155	177
1	2.571	726	Natural	10.38	8.98	155	177
1	2.575	726	Natural	10.38	8.98	155	177
1	2.416	726	Natural	13.75	11.39	140	185
1	2.355	726	Natural	10	8.14	144	190
1	2.093	726	Natural	5.88	5.05	105	186
1	2.784	726	Natural	4.75	4.3	173	188
1	2.779	726	Natural	4.75	4.3	173	188
1	2.778	726	Natural	4.75	4.3	173	188
1	2.779	726	Natural	4.75	4.3	173	188
1	2.771	726	Natural	4.75	4.3	173	188
1	2.766	726	Natural	4.75	4.3	173	188
1	2.769	726	Natural	4.75	4.3	173	188
1	2.767	726	Natural	4.75	4.3	173	188
1	2.767	726	Natural	4.75	4.3	173	188
1	2.768	726	Natural	4.75	4.3	173	188
1	2.397	726	Natural	7.63	6.52	143	189
1	2.536	726	Natural	10.38	8.98	155	177
1	2.422	726	Natural	13.75	11.39	140	185
1	1.876	726	No Natural Habitat	2	1.59	87	177
1	1.191	726	Near Natural	2.75	2.32	93	181
1	1.399	726	Natural	1.88	0.17	85	180
1	1.031	726	Natural	7.38	6.38	165	176
1	0.269	726	Natural	27.5	23.7	162	159
1	0.892	726	Near Natural	8.75	7.03	154	187
1	1.276	726	Natural	9	7.62	164	179
1	0.017	726	Natural	44.13	34.97	249	143
1	0.017	726	Natural	44.13	34.97	249	143
1	0.012	726	Natural	44.13	34.97	249	143
1	0.004	726	Natural	44.13	34.97	249	143
1	0.001	726	Natural	44.13	34.97	249	143
1	0.036	726	Natural	44.13	34.97	249	143
1	0.014	726	Natural	44.13	34.97	249	143
1	0.007	726	Natural	44.13	34.97	249	143
1	0.008	726	Natural	44.13	34.97	249	143
1	0.003	726	Natural	44.13	34.97	249	143
1	0.008	726	Natural	44.13	34.97	249	143
1	0.006	726	Natural	44.13	34.97	249	143
1	0.007	726	Natural	44.13	34.97	249	143
1	0.006	726	Natural	44.13	34.97	249	143
1	0.007	726	Natural	44.13	34.97	249	143
1	0.006	726	Natural	44.13	34.97	249	143
1	0.012	726	Natural	44.13	34.97	249	143
1	0.008	726	Natural	44.13	34.97	249	143
1	0.006	726	Natural	44.13	34.97	249	143
1	0.005	726	Natural	44.13	34.97	249	143
1	0.009	726	Natural	44.13	34.97	249	143
1	0.006	726	Natural	44.13	34.97	249	143
1	0.133	726	Natural	44.13	34.32	190	152
1	0.291	726	Natural	41.75	32.39	178	173
1	0.819	726	No Natural Habitat	7.38	6.49	93	181
1	2.348	726	Natural	6.25	5.59	104	177
1	1.305	726	Natural	4.63	4.02	92	178
1	0.864	726	No Natural Habitat	5.63	4.77	116	182
1	1.002	726	No Natural Habitat	3.75	3.29	101	179
1	0.988	726	No Natural Habitat	2.88	2.31	97	183
1	1.681	726	No Natural Habitat	0.75	0.35	86	181
1	2.04	726	No Natural Habitat	2.38	0.86	90	183
1	2.724	726	No Natural Habitat	2.13	0.17	86	180
1	0.773	726	No Natural Habitat	7.75	6.34	147	191
1	0.453	726	Natural	34	18.92	242	123
1	0.334	726	Natural	41.5	32.29	236	140
1	0.336	726	Natural	36.5	30.09	190	144
1	0.337	726	Natural	36	28.48	220	129
1	0.338	726	Natural	36	28.48	220	129
1	0.338	726	Natural	36	28.48	220	129
1	0.337	726	Natural	36	28.48	220	129
1	0.333	726	Natural	37.38	19.01	278	138
1	0.337	726	Natural	37.38	19.01	278	138
1	0.333	726	Natural	37.38	19.01	278	138
1	0.333	726	Natural	37.38	19.01	278	138
1	0.125	726	Natural	40	32.57	195	146
1	0.035	726	Natural	41.13	33.29	194	152
1	0.032	726	Natural	41.13	33.29	194	152
1	0.037	726	Natural	41.13	33.29	194	152
1	0.037	726	Natural	41.13	33.29	194	152
1	0.036	726	Natural	41.13	33.29	194	152
1	0.037	726	Natural	41.13	33.29	194	152
1	0.037	726	Natural	41.13	33.29	194	152
1	0.038	726	Natural	41.13	33.29	194	152
1	0.037	726	Natural	41.13	33.29	194	152
1	0.036	726	Natural	41.13	33.29	194	152
1	0.035	726	Natural	41.13	33.29	194	152
1	0.036	726	Natural	41.13	33.29	194	152
1	0.039	726	Natural	41.13	33.29	194	152
1	0.035	726	Natural	41.13	33.29	194	152
1	0.039	726	Natural	41.13	33.29	194	152
1	0.038	726	Natural	41.13	33.29	194	152
1	0.036	726	Natural	41.13	33.29	194	152
1	0.038	726	Natural	41.13	33.29	194	152
1	0.035	726	Natural	41.13	33.29	194	152
1	0.039	726	Natural	41.13	33.29	194	152
1	0.038	726	Natural	41.13	33.29	194	152
1	0.039	726	Natural	41.13	33.29	194	152
1	0.038	726	Natural	41.13	33.29	194	152
1	0.039	726	Natural	41.13	33.29	194	152
1	0.033	726	Natural	41.13	33.29	194	152
1	0.037	726	Natural	41.13	33.29	194	152
1	0.037	726	Natural	41.13	33.29	194	152
1	0.037	726	Natural	41.13	33.29	194	152
1	0.041	726	Natural	41.13	33.29	194	152
1	0.038	726	Natural	41.13	33.29	194	152
1	0.038	726	Natural	41.13	33.29	194	152
1	0.039	726	Natural	41.13	33.29	194	152
1	0.037	726	Natural	41.13	33.29	194	152
1	0.043	726	Natural	41.13	33.29	194	152
1	0.033	726	Natural	41.13	33.29	194	152
1	0.031	726	Natural	41.13	33.29	194	152
1	0.464	726	Natural	34	18.92	242	123
1	0.903	726	Natural	15.88	12.34	230	169
1	0.948	726	Natural	15.88	12.34	230	169
1	0.948	726	Natural	15.88	12.34	230	169
1	0.943	726	Natural	15.88	12.34	230	169
1	0.949	726	Natural	15.88	12.34	230	169
1	0.953	726	Natural	15.88	12.34	230	169
1	0.941	726	Natural	15.88	12.34	230	169
1	0.923	726	Natural	15.88	12.34	230	169
1	0.933	726	Natural	15.88	12.34	230	169
1	0.534	726	Natural	32.5	27.09	196	116
1	0.14	726	Natural	26.75	23.42	162	162
1	0.117	726	Natural	40	32.57	195	146
1	0.115	726	Natural	40	32.57	195	146
1	0.089	726	Natural	41.13	33.29	194	152
1	0.158	726	Natural	44.13	34.32	190	152
1	0.248	726	Natural	54	38.72	245	155
1	0.586	726	Natural	55.88	38.55	237	168
1	0.481	726	Natural	55.88	38.55	237	168
1	0.481	726	Natural	55.88	38.55	237	168
1	0.491	726	Natural	55.88	38.55	237	168
1	0.011	726	Natural	44.13	34.97	249	143
1	0.011	726	Natural	44.13	34.97	249	143
1	0.015	726	Natural	44.13	34.97	249	143
1	0.014	726	Natural	44.13	34.97	249	143
1	0.011	726	Natural	44.13	34.97	249	143
1	0.011	726	Natural	44.13	34.97	249	143
1	0.01	726	Natural	44.13	34.97	249	143
1	0.013	726	Natural	44.13	34.97	249	143
1	0.331	726	Natural	47.25	34.96	294	169
1	0.515	726	Natural	55.88	38.55	237	168
1	0.468	726	Natural	48.38	36.06	187	164
1	0.093	726	Natural	41.13	33.29	194	152
1	0.06	726	Natural	40	32.57	195	146
1	0.163	726	Natural	44.13	34.32	190	152
1	0.409	726	Natural	56.25	38.89	267	162
1	0.143	726	Natural	44.13	34.32	190	152
1	0.489	726	Natural	55.88	38.55	237	168
1	1.56	726	Natural	21.63	18.38	244	173
1	1.517	726	Natural	21.63	18.38	244	173
1	1.51	726	Natural	21.63	18.38	244	173
1	1.53	726	Natural	21.63	18.38	244	173
1	1.532	726	Natural	21.63	18.38	244	173
1	1.534	726	Natural	21.63	18.38	244	173
1	1.536	726	Natural	21.63	18.38	244	173
1	1.595	726	Natural	18.25	14.87	269	177
1	0.468	726	Natural	48.38	36.06	187	164
1	0.477	726	Natural	55.88	38.55	237	168
1	1.85	726	Natural	5.38	4.63	97	185
1	3.1	726	Natural	6.88	2.71	206	187
1	3.115	726	Natural	6.88	2.71	206	187
1	2.582	726	Natural	5.13	4.11	161	184
1	2.458	726	Natural	6.38	5.53	155	190
1	2.42	726	Natural	11.25	8.8	157	188
1	2.99	726	No Natural Habitat	3.88	3.18	188	186
1	3.118	726	Natural	6.88	2.71	206	187
1	3.106	726	Natural	6.88	2.71	206	187
1	3.114	726	Natural	6.88	2.71	206	187
1	3.116	726	Natural	6.88	2.71	206	187
1	3.113	726	Natural	6.88	2.71	206	187
1	3.116	726	Natural	6.88	2.71	206	187
1	3.115	726	Natural	6.88	2.71	206	187
1	3.112	726	Natural	6.88	2.71	206	187
1	2.901	726	Natural	5.63	4.73	168	193
1	3.088	726	Natural	3.25	1.89	198	184
1	2.646	726	Natural	3.25	2.8	165	186
1	3.17	726	Natural	4.38	4	206	182
1	3.122	726	Natural	6.88	2.71	206	187
1	3.111	726	Natural	6.88	2.71	206	187
1	3.12	726	Natural	6.88	2.71	206	187
1	3.118	726	Natural	6.88	2.71	206	187
1	2.814	726	No Natural Habitat	4.63	3.82	175	188
1	2.502	726	Natural	12.25	10.71	143	180
1	2.504	726	Natural	12.25	10.71	143	180
1	2.502	726	Natural	12.25	10.71	143	180
1	2.506	726	Natural	12.25	10.71	143	180
1	2.506	726	Natural	12.25	10.71	143	180
1	2.505	726	Natural	12.25	10.71	143	180
1	2.503	726	Natural	12.25	10.71	143	180
1	2.503	726	Natural	12.25	10.71	143	180
1	2.506	726	Natural	12.25	10.71	143	180
1	2.152	726	Natural	7.63	6.66	115	186
1	2.732	726	Natural	3.75	2.88	167	185
1	2.511	726	Natural	12.25	10.71	143	180
1	2.512	726	Natural	12.25	10.71	143	180
1	2.426	726	Natural	11.25	8.8	157	188
1	2.492	726	Natural	11.25	8.8	157	188
1	2.79	726	Natural	4.75	4.3	173	188
1	2.463	726	Natural	11.25	8.8	157	188
1	2.564	726	Natural	3.63	3.3	161	188
1	2.793	726	Natural	4.75	4.3	173	188
1	2.789	726	Natural	4.75	4.3	173	188
1	2.779	726	Natural	4.75	4.3	173	188
1	2.78	726	Natural	4.75	4.3	173	188
1	2.779	726	Natural	4.75	4.3	173	188
1	2.779	726	Natural	4.75	4.3	173	188
1	2.769	726	Natural	4.75	4.3	173	188
1	2.782	726	Natural	4.75	4.3	173	188
1	2.783	726	Natural	4.75	4.3	173	188
1	2.774	726	Natural	4.75	4.3	173	188
1	2.775	726	Natural	4.75	4.3	173	188
1	2.765	726	Natural	4.75	4.3	173	188
1	2.767	726	Natural	4.75	4.3	173	188
1	2.777	726	Natural	4.75	4.3	173	188
1	2.778	726	Natural	4.75	4.3	173	188
1	2.707	726	Natural	3.75	3.23	170	187
1	2.197	726	Natural	7.75	6.63	124	188
1	2.217	726	No Natural Habitat	4.5	3.99	126	186
1	1.743	726	No Natural Habitat	3.25	2.74	89	182
1	1.881	726	Natural	4.88	4	96	187
1	3.114	726	Natural	6.88	2.71	206	187
1	3.115	726	Natural	6.88	2.71	206	187
1	3.117	726	Natural	6.88	2.71	206	187
1	3.116	726	Natural	6.88	2.71	206	187
1	3.118	726	Natural	6.88	2.71	206	187
1	3.119	726	Natural	6.88	2.71	206	187
1	3.118	726	Natural	6.88	2.71	206	187
1	3.117	726	Natural	6.88	2.71	206	187
1	3.114	726	Natural	6.88	2.71	206	187
1	3.115	726	Natural	6.88	2.71	206	187
1	3.114	726	Natural	6.88	2.71	206	187
1	3.099	726	Natural	3.25	2.86	197	178
1	2.671	726	No Natural Habitat	4.75	4.18	145	188
1	2.904	726	Natural	5	4.25	167	192
1	2.942	726	Natural	6.13	5.16	178	195
1	2.164	726	Natural	7	6.01	127	190
1	1.541	726	Natural	3.75	3.25	90	178
1	1.277	726	Natural	9	7.85	169	180
1	0.906	726	No Natural Habitat	9.88	8	168	188
1	0.368	726	Natural	56	38.83	207	166
1	0.793	726	Natural	13.13	9.95	311	199
1	0.8	726	Natural	39.5	29.3	280	182
1	0.778	726	Natural	19.25	15.49	308	189
1	0.037	726	Natural	41.13	33.29	194	152
1	0.044	726	Natural	41.13	33.29	194	152
1	0.046	726	Natural	41.13	33.29	194	152
1	0.033	726	Natural	41.13	33.29	194	152
1	0.04	726	Natural	41.13	33.29	194	152
1	0.101	726	Natural	47.5	37.35	245	140
1	0.313	726	Natural	41.5	32.29	236	140
1	0.142	726	Natural	47.5	37.35	245	140
1	0.139	726	Natural	44.13	34.32	190	152
1	0.129	726	Natural	47.5	37.35	245	140
1	0.137	726	Natural	47.5	37.35	245	140
1	0.133	726	Natural	47.5	37.35	245	140
1	0.139	726	Natural	47.5	37.35	245	140
1	0.14	726	Natural	47.5	37.35	245	140
1	0.269	726	Natural	47.25	34.96	294	169
1	0.463	726	Natural	48.38	36.06	187	164
1	0.856	726	Natural	13.13	9.95	311	199
1	0.476	726	Natural	55.88	38.55	237	168
1	0.477	726	Natural	55.88	38.55	237	168
1	0.478	726	Natural	55.88	38.55	237	168
1	0.032	726	Natural	41.13	33.29	194	152
1	0.034	726	Natural	41.13	33.29	194	152
1	0.074	726	Natural	41.13	33.29	194	152
1	0.193	726	Natural	54	38.72	245	155
1	0.196	726	Natural	54	38.72	245	155
1	0.195	726	Natural	54	38.72	245	155
1	0.193	726	Natural	44.13	34.32	190	152
1	0.193	726	Natural	44.13	34.32	190	152
1	0.192	726	Natural	44.13	34.32	190	152
1	0.188	726	Natural	44.13	34.32	190	152
1	0.188	726	Natural	44.13	34.32	190	152
1	0.189	726	Natural	54	38.72	245	155
1	0.753	726	Natural	19.25	15.49	308	189
1	0.039	726	Natural	41.13	33.29	194	152
1	0.039	726	Natural	41.13	33.29	194	152
1	0.038	726	Natural	41.13	33.29	194	152
1	0.04	726	Natural	41.13	33.29	194	152
1	0.039	726	Natural	41.13	33.29	194	152
1	0.042	726	Natural	41.13	33.29	194	152
1	0.049	726	Natural	41.13	33.29	194	152
1	0.032	726	Natural	41.13	33.29	194	152
1	0.053	726	Natural	28.5	24.53	163	163
1	0.044	726	Natural	41.13	33.29	194	152
1	0.032	726	Natural	41.13	33.29	194	152
1	0.043	726	Natural	41.13	33.29	194	152
1	0.03	726	Natural	41.13	33.29	194	152
1	0.039	726	Natural	41.13	33.29	194	152
1	0.056	726	Natural	40	32.57	195	146
1	0.036	726	Natural	41.13	33.29	194	152
1	0.392	726	Natural	56.25	38.89	267	162
1	0.007	726	Natural	44.13	34.97	249	143
1	0.004	726	Natural	44.13	34.97	249	143
1	0.004	726	Natural	44.13	34.97	249	143
1	0.009	726	Natural	44.13	34.97	249	143
1	0.003	726	Natural	44.13	34.97	249	143
1	0.007	726	Natural	44.13	34.97	249	143
1	0.007	726	Natural	44.13	34.97	249	143
1	0.006	726	Natural	44.13	34.97	249	143
1	0.001	726	Natural	44.13	34.97	249	143
1	0.003	726	Natural	44.13	34.97	249	143
1	0.002	726	Natural	44.13	34.97	249	143
1	0.003	726	Natural	44.13	34.97	249	143
1	0.003	726	Natural	44.13	34.97	249	143
1	0.003	726	Natural	44.13	34.97	249	143
1	0.001	726	Natural	44.13	34.97	249	143
1	0.004	726	Natural	44.13	34.97	249	143
1	0.001	726	Natural	44.13	34.97	249	143
1	0.016	726	Natural	41.13	33.29	194	152
1	0.031	726	Natural	41.13	33.29	194	152
1	0.025	726	Natural	41.13	33.29	194	152
1	0.429	726	No Natural Habitat	4	2.66	116	185
1	0.04	726	Natural	41.13	33.29	194	152
1	0.343	726	No Natural Habitat	7.88	6.46	119	184
1	0.163	726	Natural	17.5	15.85	142	173
1	0.103	726	Natural	28.5	24.53	163	163
1	0.102	726	Natural	28.5	24.53	163	163
1	0.009	726	Natural	44.13	34.97	249	143
1	0.009	726	Natural	44.13	34.97	249	143
1	0.007	726	Natural	44.13	34.97	249	143
1	0.014	726	Natural	44.13	34.97	249	143
1	0.004	726	Natural	44.13	34.97	249	143
1	0.005	726	Natural	44.13	34.97	249	143
1	0	726	Natural	44.13	34.97	249	143
1	0.004	726	Natural	44.13	34.97	249	143
1	0.005	726	Natural	44.13	34.97	249	143
1	0.01	726	Natural	44.13	34.97	249	143
1	0.004	726	Natural	44.13	34.97	249	143
1	0.003	726	Natural	44.13	34.97	249	143
1	0.027	726	Natural	44.13	34.97	249	143
1	0.016	726	Natural	44.13	34.97	249	143
1	0.033	726	Natural	44.13	34.97	249	143
1	0.008	726	Natural	44.13	34.97	249	143
1	0.009	726	Natural	44.13	34.97	249	143
1	0.004	726	Natural	44.13	34.97	249	143
1	0.006	726	Natural	44.13	34.97	249	143
1	0.016	726	Natural	44.13	34.97	249	143
1	0.012	726	Natural	44.13	34.97	249	143
1	0.002	726	Natural	44.13	34.97	249	143
1	0.016	726	Natural	44.13	34.97	249	143
1	0.037	726	Natural	44.13	34.97	249	143
1	0.024	726	Natural	44.13	34.97	249	143
1	0.016	726	Natural	44.13	34.97	249	143
1	0.015	726	Natural	44.13	34.97	249	143
1	0.001	726	Natural	44.13	34.97	249	143
1	0.006	726	Natural	44.13	34.97	249	143
1	0.002	726	Natural	44.13	34.97	249	143
1	0.003	726	Natural	44.13	34.97	249	143
1	0.022	726	Natural	44.13	34.97	249	143
1	0.005	726	Natural	44.13	34.97	249	143
1	0.015	726	Natural	44.13	34.97	249	143
1	0.029	726	Natural	41.13	33.29	194	152
1	0.367	726	Natural	9.5	6.68	327	167
1	0.112	726	Natural	47.5	37.35	245	140
1	0.028	726	Natural	41.13	33.29	194	152
1	0.041	726	Natural	41.13	33.29	194	152
1	0.032	726	Natural	41.13	33.29	194	152
1	0.024	726	Natural	41.13	33.29	194	152
1	0.021	726	Natural	41.13	33.29	194	152
1	0.17	726	Natural	17.5	15.85	142	173
1	0.024	726	Natural	41.13	33.29	194	152
1	0.046	726	Natural	41.13	33.29	194	152
1	0.026	726	Natural	41.13	33.29	194	152
1	0.028	726	Natural	41.13	33.29	194	152
1	0.052	726	Natural	41.13	33.29	194	152
1	0.026	726	Natural	41.13	33.29	194	152
1	0.025	726	Natural	41.13	33.29	194	152
1	0.028	726	Natural	41.13	33.29	194	152
1	0.02	726	Natural	41.13	33.29	194	152
1	0.003	726	Natural	44.13	34.97	249	143
1	0.003	726	Natural	44.13	34.97	249	143
1	0.003	726	Natural	44.13	34.97	249	143
1	0.006	726	Natural	44.13	34.97	249	143
1	0.007	726	Natural	44.13	34.97	249	143
1	0.002	726	Natural	44.13	34.97	249	143
1	0.008	726	Natural	44.13	34.97	249	143
1	0.01	726	Natural	44.13	34.97	249	143
1	0.01	726	Natural	44.13	34.97	249	143
1	0.007	726	Natural	44.13	34.97	249	143
1	0.004	726	Natural	44.13	34.97	249	143
1	0.024	726	Natural	44.13	34.97	249	143
1	0.002	726	Natural	44.13	34.97	249	143
1	0.009	726	Natural	44.13	34.97	249	143
1	0.009	726	Natural	44.13	34.97	249	143
1	0.016	726	Natural	44.13	34.97	249	143
1	0.006	726	Natural	44.13	34.97	249	143
1	0.003	726	Natural	44.13	34.97	249	143
1	0.007	726	Natural	44.13	34.97	249	143
1	0.009	726	Natural	44.13	34.97	249	143
1	0.005	726	Natural	44.13	34.97	249	143
1	0.024	726	Natural	44.13	34.97	249	143
1	0.015	726	Natural	44.13	34.97	249	143
1	0.013	726	Natural	44.13	34.97	249	143
1	0.035	726	Natural	44.13	34.97	249	143
1	0.057	726	Natural	34.75	28.1	296	150
1	0.009	726	Natural	44.13	34.97	249	143
1	0.021	726	Natural	44.13	34.97	249	143
1	0.073	726	Natural	28.5	24.53	163	163
1	0.211	726	Natural	54	38.72	245	155
1	0.024	726	Natural	41.13	33.29	194	152
1	0.034	726	Natural	41.13	33.29	194	152
1	0.026	726	Natural	41.13	33.29	194	152
1	0.024	726	Natural	41.13	33.29	194	152
1	0.015	726	Natural	44.13	34.97	249	143
1	0.029	726	Natural	44.13	34.97	249	143
1	0.022	726	Natural	41.13	33.29	194	152
1	0.216	726	Natural	54	38.72	245	155
1	0.827	726	Natural	45.25	32.98	218	179
1	0.836	726	Natural	45.25	32.98	218	179
1	0.024	726	Natural	44.13	34.97	249	143
1	0.004	726	Natural	44.13	34.97	249	143
1	0.015	726	Natural	44.13	34.97	249	143
1	0.059	726	Natural	34.75	28.1	296	150
1	0.011	726	Natural	44.13	34.97	249	143
1	0.005	726	Natural	44.13	34.97	249	143
1	0.017	726	Natural	44.13	34.97	249	143
1	0.009	726	Natural	44.13	34.97	249	143
1	0.005	726	Natural	44.13	34.97	249	143
1	0.01	726	Natural	44.13	34.97	249	143
1	0.018	726	Natural	44.13	34.97	249	143
1	0.001	726	Natural	44.13	34.97	249	143
1	0.004	726	Natural	44.13	34.97	249	143
1	0.002	726	Natural	44.13	34.97	249	143
1	0.001	726	Natural	44.13	34.97	249	143
1	0.008	726	Natural	44.13	34.97	249	143
1	0.007	726	Natural	44.13	34.97	249	143
1	0.007	726	Natural	44.13	34.97	249	143
1	0.004	726	Natural	44.13	34.97	249	143
1	0.022	726	Natural	41.13	33.29	194	152
1	0.094	726	Natural	28.5	24.53	163	163
1	0.01	726	Natural	44.13	34.97	249	143
1	0.014	726	Natural	44.13	34.97	249	143
1	0.032	726	Natural	44.13	34.97	249	143
1	0.003	726	Natural	44.13	34.97	249	143
1	0.02	726	Natural	44.13	34.97	249	143
1	0.058	726	Natural	41.13	33.29	194	152
1	0.051	726	Natural	41.13	33.29	194	152
1	0.049	726	Natural	41.13	33.29	194	152
1	0.058	726	Natural	41.13	33.29	194	152
1	0.053	726	Natural	41.13	33.29	194	152
1	0.053	726	Natural	41.13	33.29	194	152
1	0.057	726	Natural	41.13	33.29	194	152
1	0.052	726	Natural	41.13	33.29	194	152
1	0.058	726	Natural	41.13	33.29	194	152
1	0.054	726	Natural	41.13	33.29	194	152
1	0.086	726	Natural	28.5	24.53	163	163
1	0.08	726	Natural	28.5	24.53	163	163
1	0.056	726	Natural	41.13	33.29	194	152
1	0.052	726	Natural	41.13	33.29	194	152
1	0.118	726	Natural	28.5	24.53	163	163
1	0.061	726	Natural	41.13	33.29	194	152
1	0.058	726	Natural	41.13	33.29	194	152
1	0.036	726	Natural	44.13	34.97	249	143
1	0.066	726	Natural	41.13	33.29	194	152
1	0.132	726	Natural	28.5	24.53	163	163
1	0.292	726	No Natural Habitat	7.88	6.46	119	184
1	0.06	726	Natural	41.13	33.29	194	152
1	0.076	726	Natural	41.13	33.29	194	152
1	0.062	726	Natural	41.13	33.29	194	152
1	0.366	726	No Natural Habitat	6.88	5.48	125	178
1	0.14	726	Natural	28.5	24.53	163	163
1	0.106	726	Natural	41.13	33.29	194	152
1	0.178	726	Natural	44.13	34.32	190	152
1	0.019	726	Natural	41.13	33.29	194	152
1	0.024	726	Natural	41.13	33.29	194	152
1	0.111	726	Natural	28.5	24.53	163	163
1	0.041	726	Natural	41.13	33.29	194	152
1	0.054	726	Natural	41.13	33.29	194	152
1	0.022	726	Natural	41.13	33.29	194	152
1	0.023	726	Natural	41.13	33.29	194	152
1	0.024	726	Natural	41.13	33.29	194	152
1	0.025	726	Natural	41.13	33.29	194	152
1	0.125	726	Natural	34.75	28.1	296	150
1	0.025	726	Natural	41.13	33.29	194	152
1	0.023	726	Natural	41.13	33.29	194	152
1	0.027	726	Natural	41.13	33.29	194	152
1	0.023	726	Natural	41.13	33.29	194	152
1	0.027	726	Natural	41.13	33.29	194	152
1	0.027	726	Natural	41.13	33.29	194	152
1	0.156	726	Natural	38.75	30.47	305	153
1	0.024	726	Natural	41.13	33.29	194	152
1	0.025	726	Natural	41.13	33.29	194	152
1	0.021	726	Natural	41.13	33.29	194	152
1	0.025	726	Natural	41.13	33.29	194	152
1	0.02	726	Natural	41.13	33.29	194	152
1	0.023	726	Natural	41.13	33.29	194	152
1	0.021	726	Natural	41.13	33.29	194	152
1	0.031	726	Natural	41.13	33.29	194	152
1	0.081	726	Natural	40	32.57	195	146
1	0.019	726	Natural	41.13	33.29	194	152
1	0.026	726	Natural	41.13	33.29	194	152
1	0.021	726	Natural	41.13	33.29	194	152
1	0.022	726	Natural	41.13	33.29	194	152
1	0.018	726	Natural	41.13	33.29	194	152
1	0.023	726	Natural	41.13	33.29	194	152
1	0.033	726	Natural	41.13	33.29	194	152
1	0.023	726	Natural	41.13	33.29	194	152
1	0.021	726	Natural	41.13	33.29	194	152
1	0.011	726	Natural	44.13	34.97	249	143
1	0.02	726	Natural	41.13	33.29	194	152
1	0.017	726	Natural	41.13	33.29	194	152
1	0.028	726	Natural	41.13	33.29	194	152
1	0.024	726	Natural	44.13	34.97	249	143
1	0.098	726	Natural	30.38	25.45	288	153
1	0.095	726	Natural	40	32.57	195	146
1	0.091	726	Natural	40	32.57	195	146
1	0.086	726	Natural	40	32.57	195	146
1	0.091	726	Natural	40	32.57	195	146
1	0.087	726	Natural	40	32.57	195	146
1	0.092	726	Natural	40	32.57	195	146
1	0.087	726	Natural	40	32.57	195	146
1	0.086	726	Natural	40	32.57	195	146
1	0.087	726	Natural	40	32.57	195	146
1	0.174	726	Natural	26.75	23.42	162	162
1	1.462	726	Near Natural	2.75	2.32	87	178
1	1.471	726	Near Natural	2.75	2.32	87	178
1	1.462	726	Near Natural	2	1.72	86	179
1	1.463	726	Near Natural	2.75	2.32	87	178
1	1.47	726	Near Natural	2.75	2.32	87	178
1	1.456	726	Near Natural	2.75	2.32	87	178
1	1.462	726	Near Natural	2.75	2.32	87	178
1	1.465	726	Near Natural	2.75	2.32	87	178
1	1.472	726	Near Natural	2.75	2.32	87	178
1	1.451	726	Near Natural	2.75	2.32	87	178
1	1.47	726	Near Natural	2.75	2.32	87	178
1	1.467	726	Near Natural	2.75	2.32	87	178
1	1.472	726	Near Natural	2.75	2.32	87	178
1	1.454	726	Near Natural	2.75	2.32	87	178
1	1.475	726	Near Natural	2.75	2.32	87	178
1	1.469	726	Near Natural	2.75	2.32	87	178
1	1.498	726	Natural	2	1.72	86	179
1	1.471	726	Near Natural	2.75	2.32	87	178
1	1.472	726	Near Natural	2.75	2.32	87	178
1	1.472	726	Near Natural	2.75	2.32	87	178
1	1.468	726	Near Natural	2.75	2.32	87	178
1	1.467	726	Near Natural	2.75	2.32	87	178
1	1.47	726	Near Natural	2.75	2.32	87	178
1	1.466	726	Near Natural	2.75	2.32	87	178
1	1.469	726	Near Natural	2.75	2.32	87	178
1	1.469	726	Near Natural	2.75	2.32	87	178
1	1.47	726	Near Natural	2.75	2.32	87	178
1	1.467	726	Near Natural	2.75	2.32	87	178
1	1.463	726	Near Natural	2.75	2.32	87	178
1	1.465	726	Near Natural	2.75	2.32	87	178
1	1.477	726	Near Natural	2.75	2.32	87	178
1	1.468	726	Near Natural	2.75	2.32	87	178
1	1.752	726	Natural	2	1.19	85	182
1	1.832	726	Natural	2.5	1.61	89	179
1	1.83	726	Natural	2.5	1.61	89	179
1	1.832	726	Natural	2.5	1.61	89	179
1	2.343	726	Natural	6.25	5.59	104	177
1	2.342	726	Natural	6.25	5.59	104	177
1	2.338	726	Natural	6.25	5.59	104	177
1	2.129	726	Natural	5.63	5.12	109	185
1	2.049	726	Natural	5.5	4.78	105	186
1	2.588	726	Natural	9.5	8.3	152	177
1	2.518	726	Natural	12.25	10.71	143	180
1	2.512	726	Natural	12.25	10.71	143	180
1	2.64	726	Natural	8.25	7.52	142	180
1	2.639	726	Natural	8.25	7.52	142	180
1	2.64	726	Natural	8.25	7.52	142	180
1	2.851	726	Natural	8.75	7.61	108	184
1	2.84	726	Natural	8.75	7.61	108	184
1	2.837	726	Natural	8.75	7.61	108	184
1	2.816	726	Natural	9.25	8.16	115	182
1	2.821	726	Natural	8.75	7.61	108	184
1	2.469	726	Natural	8	7.05	108	178
1	2.069	726	No Natural Habitat	6.13	5.16	92	186
1	1.57	726	Near Natural	1.5	1.09	85	184
1	1.44	726	No Natural Habitat	0.88	0.23	84	181
1	0.93	726	No Natural Habitat	5.75	1.98	79	175
1	1.401	726	No Natural Habitat	1.38	1.27	79	178
1	1.729	726	Degraded	11.25	9.41	268	173
1	0.575	726	Natural	47.25	33.44	278	184
1	0.492	726	Natural	55.88	38.55	237	168
1	0.481	726	Natural	48.38	36.06	187	164
1	0.48	726	Natural	48.38	36.06	187	164
1	0.729	726	No Natural Habitat	6	4.25	108	184
1	2.069	726	Natural	7.13	6.01	110	186
1	2.648	726	Natural	8.25	7.52	142	180
1	2.683	726	Natural	9	8.09	153	180
1	2.685	726	Natural	9	8.09	153	180
1	2.687	726	Natural	9	8.09	153	180
1	2.655	726	Natural	8.25	7.52	142	180
1	2.261	726	Natural	4.75	4.06	108	181
1	1.864	726	Natural	1.63	1.09	85	180
1	1.776	726	Near Natural	1.13	0.36	87	181
1	1.365	726	Near Natural	1.13	0.51	84	182
1	0.72	726	No Natural Habitat	3.88	3.15	94	184
1	1.379	726	Natural	9.38	7.62	242	169
1	1.542	726	No Natural Habitat	8.13	6.71	229	169
1	2.107	726	No Natural Habitat	5.5	4.47	177	172
1	4.662	726	No Natural Habitat	5.5	3.6	186	181
1	5.801	726	Degraded	4.25	2.55	252	186
1	5.52	726	Degraded	5	4.16	221	187
1	4.41	726	No Natural Habitat	3.63	3	170	183
1	0.464	726	Natural	48.38	36.06	187	164
1	0.461	726	Natural	48.38	36.06	187	164
1	0.467	726	Natural	56.25	38.89	267	162
1	0.469	726	Natural	48.38	36.06	187	164
1	0.461	726	Natural	48.38	36.06	187	164
1	0.459	726	Natural	48.38	36.06	187	164
1	0.461	726	Natural	48.38	36.06	187	164
1	0.443	726	Natural	48.38	36.06	187	164
1	0.456	726	Natural	48.38	36.06	187	164
1	0.453	726	Natural	48.38	36.06	187	164
1	1.251	726	Natural	3.63	3.11	107	178
1	3.226	726	No Natural Habitat	3.38	2.95	120	178
1	3.803	726	Near Natural	4.63	3.34	145	182
1	3.912	726	Degraded	1.88	1.41	171	185
1	6.164	726	Degraded	1.25	1.2	177	178
1	6.667	726	Degraded	0.75	0.37	177	182
1	8.489	726	Near Natural	2	1.54	178	185
1	10.463	726	Natural	15.88	13.12	256	152
1	11.152	726	Natural	1.38	0.91	171	179
1	10.611	726	Natural	7	2.74	199	176
1	10.66	726	Natural	4.75	3.41	299	190
1	7.03	726	No Natural Habitat	0.75	0.51	169	179
1	6.96	726	Degraded	1.13	0.7	174	182
1	5.144	726	Natural	3.25	2.56	199	175
1	3.018	726	Natural	5.63	4.99	181	195
1	0.996	726	Natural	6	5.41	125	172
1	0.138	726	Natural	47.5	37.35	245	140
1	0.137	726	Natural	47.5	37.35	245	140
1	0.163	726	Natural	44.13	34.32	190	152
1	0.14	726	Natural	47.5	37.35	245	140
1	0.147	726	Natural	47.5	37.35	245	140
1	0.145	726	Natural	47.5	37.35	245	140
1	0.156	726	Natural	44.13	34.32	190	152
1	0.16	726	Natural	44.13	34.32	190	152
1	0.144	726	Natural	44.13	34.32	190	152
1	0.143	726	Natural	44.13	34.32	190	152
1	0.144	726	Natural	44.13	34.32	190	152
1	0.142	726	Natural	47.5	37.35	245	140
1	0.144	726	Natural	44.13	34.32	190	152
1	0.143	726	Natural	47.5	37.35	245	140
1	0.143	726	Natural	47.5	37.35	245	140
1	0.144	726	Natural	44.13	34.32	190	152
1	0.141	726	Natural	47.5	37.35	245	140
1	0.142	726	Natural	47.5	37.35	245	140
1	0.142	726	Natural	47.5	37.35	245	140
1	0.709	726	No Natural Habitat	6.75	5.38	112	174
1	0.71	726	No Natural Habitat	6.75	5.38	112	174
1	0.71	726	No Natural Habitat	6.75	5.38	112	174
1	0.711	726	No Natural Habitat	6.75	5.38	112	174
1	0.71	726	No Natural Habitat	6.75	5.38	112	174
1	0.712	726	No Natural Habitat	6.75	5.38	112	174
1	0.706	726	No Natural Habitat	6.75	5.38	112	174
1	0.701	726	No Natural Habitat	6.75	5.38	112	174
1	1.969	726	Natural	7.13	6.1	107	187
1	2.565	726	Natural	5.13	4.11	161	184
1	2.856	726	No Natural Habitat	4.63	3.19	182	185
1	1.994	726	No Natural Habitat	7.38	6.25	111	188
1	2.392	726	Natural	10	8.14	144	190
1	2.377	726	No Natural Habitat	5.75	4.82	130	193
1	0.405	726	Natural	33.88	26.86	164	176
1	0.515	726	Natural	55.88	38.55	237	168
1	0.516	726	Natural	55.88	38.55	237	168
1	0.517	726	Natural	55.88	38.55	237	168
1	0.512	726	Natural	55.88	38.55	237	168
1	0.516	726	Natural	55.88	38.55	237	168
1	0.515	726	Natural	55.88	38.55	237	168
1	0.51	726	Natural	55.88	38.55	237	168
1	0.511	726	Natural	55.88	38.55	237	168
1	0.517	726	Natural	55.88	38.55	237	168
1	0.518	726	Natural	55.88	38.55	237	168
1	0.513	726	Natural	55.88	38.55	237	168
1	0.517	726	Natural	55.88	38.55	237	168
1	0.517	726	Natural	55.88	38.55	237	168
1	0.511	726	Natural	55.88	38.55	237	168
1	0.515	726	Natural	55.88	38.55	237	168
1	0.512	726	Natural	55.88	38.55	237	168
1	0.515	726	Natural	55.88	38.55	237	168
1	0.514	726	Natural	55.88	38.55	237	168
1	0.519	726	Natural	55.88	38.55	237	168
1	0.514	726	Natural	55.88	38.55	237	168
1	0.517	726	Natural	55.88	38.55	237	168
1	0.515	726	Natural	55.88	38.55	237	168
1	0.515	726	Natural	55.88	38.55	237	168
1	0.521	726	Natural	55.88	38.55	237	168
1	0.516	726	Natural	55.88	38.55	237	168
1	0.516	726	Natural	55.88	38.55	237	168
1	0.516	726	Natural	55.88	38.55	237	168
1	0.516	726	Natural	55.88	38.55	237	168
1	0.52	726	Natural	55.88	38.55	237	168
1	0.519	726	Natural	55.88	38.55	237	168
1	0.52	726	Natural	55.88	38.55	237	168
1	0.517	726	Natural	55.88	38.55	237	168
1	0.515	726	Natural	55.88	38.55	237	168
1	0.518	726	Natural	55.88	38.55	237	168
1	0.52	726	Natural	55.88	38.55	237	168
1	0.519	726	Natural	55.88	38.55	237	168
1	0.52	726	Natural	55.88	38.55	237	168
1	0.524	726	Natural	55.88	38.55	237	168
1	0.516	726	Natural	55.88	38.55	237	168
1	0.519	726	Natural	55.88	38.55	237	168
1	0.521	726	Natural	55.88	38.55	237	168
1	0.519	726	Natural	55.88	38.55	237	168
1	0.521	726	Natural	55.88	38.55	237	168
1	0.518	726	Natural	55.88	38.55	237	168
1	0.411	726	Natural	56.25	38.89	267	162
1	0.414	726	Natural	56.25	38.89	267	162
1	0.396	726	Natural	56.25	38.89	267	162
1	0.388	726	Natural	56	38.83	207	166
1	0.021	726	Natural	41.13	33.29	194	152
1	0.159	726	Natural	44.13	34.32	190	152
1	0.16	726	Natural	44.13	34.32	190	152
1	0.159	726	Natural	44.13	34.32	190	152
1	0.155	726	Natural	44.13	34.32	190	152
1	0.849	726	Natural	45.25	32.98	218	179
1	0.82	726	Natural	45.25	32.98	218	179
1	0.824	726	Natural	45.25	32.98	218	179
1	0.83	726	Natural	45.25	32.98	218	179
1	0.88	726	Natural	45.25	32.98	218	179
1	0.879	726	Natural	45.25	32.98	218	179
1	0.877	726	Natural	45.25	32.98	218	179
1	0.879	726	Natural	45.25	32.98	218	179
1	0.879	726	Natural	45.25	32.98	218	179
1	0.879	726	Natural	45.25	32.98	218	179
1	0.881	726	Natural	45.25	32.98	218	179
1	0.879	726	Natural	45.25	32.98	218	179
1	0.877	726	Natural	45.25	32.98	218	179
1	0.879	726	Natural	45.25	32.98	218	179
1	0.878	726	Natural	45.25	32.98	218	179
1	0.878	726	Natural	45.25	32.98	218	179
1	0.869	726	Natural	45.25	32.98	218	179
1	0.924	726	Natural	30.13	23.5	188	187
1	0.929	726	Natural	30.13	23.5	188	187
1	0.927	726	Natural	30.13	23.5	188	187
1	0.922	726	Natural	41.75	30.16	249	195
1	0.924	726	Natural	30.13	23.5	188	187
1	0.926	726	Natural	30.13	23.5	188	187
1	0.927	726	Natural	30.13	23.5	188	187
1	0.92	726	Natural	30.13	23.5	188	187
1	0.925	726	Natural	30.13	23.5	188	187
1	0.93	726	Natural	41.75	30.16	249	195
1	0.921	726	Natural	41.75	30.16	249	195
1	0.919	726	Natural	30.13	23.5	188	187
1	0.924	726	Natural	41.75	30.16	249	195
1	0.926	726	Natural	30.13	23.5	188	187
1	0.918	726	Natural	23.5	18.7	169	179
1	0.923	726	Natural	30.13	23.5	188	187
1	0.921	726	Natural	30.13	23.5	188	187
1	0.939	726	Natural	30.13	23.5	188	187
1	0.929	726	Natural	30.13	23.5	188	187
1	0.921	726	Natural	30.13	23.5	188	187
1	0.921	726	Natural	30.13	23.5	188	187
1	0.927	726	Natural	30.13	23.5	188	187
1	0.928	726	Natural	30.13	23.5	188	187
1	0.929	726	Natural	30.13	23.5	188	187
1	0.928	726	Natural	30.13	23.5	188	187
1	0.927	726	Natural	30.13	23.5	188	187
1	0.927	726	Natural	30.13	23.5	188	187
1	0.661	726	Natural	48.13	34.83	205	177
1	0.082	726	Natural	40	32.57	195	146
1	0.074	726	Natural	40	32.57	195	146
1	0.348	726	Natural	56	38.83	207	166
1	0.052	726	Natural	41.13	33.29	194	152
1	0.051	726	Natural	41.13	33.29	194	152
1	0.054	726	Natural	41.13	33.29	194	152
1	0.082	726	Natural	41.13	33.29	194	152
1	0.293	726	No Natural Habitat	9	7.98	121	178
1	0.072	726	Natural	44.13	34.97	249	143
1	0.077	726	Natural	40	32.57	195	146
1	0.082	726	Natural	40	32.57	195	146
1	0.082	726	Natural	40	32.57	195	146
1	0.082	726	Natural	40	32.57	195	146
1	0.086	726	Natural	40	32.57	195	146
1	0.093	726	Natural	40	32.57	195	146
1	0.079	726	Natural	40	32.57	195	146
1	0.093	726	Natural	40	32.57	195	146
1	0.121	726	Natural	40	32.57	195	146
1	0.679	726	Natural	48.13	34.83	205	177
1	2.008	726	Natural	20.63	16.72	239	189
1	0.632	726	Natural	20.88	12.18	195	153
1	1.942	726	Natural	2.75	2.29	230	184
1	2.931	726	No Natural Habitat	3.13	2.4	149	183
1	4.92	726	Natural	2.88	2.47	177	179
1	5.146	726	Natural	4.5	3.87	193	179
1	5.515	726	Degraded	5.25	4.55	237	176
1	5.302	726	Degraded	4.63	3.83	221	188
1	3.323	726	No Natural Habitat	1	0.7	128	182
1	0.082	726	Natural	40	32.57	195	146
1	0.08	726	Natural	40	32.57	195	146
1	0.081	726	Natural	40	32.57	195	146
1	0.08	726	Natural	40	32.57	195	146
1	0.077	726	Natural	40	32.57	195	146
1	0.079	726	Natural	40	32.57	195	146
1	0.547	726	Natural	55.88	38.55	237	168
1	0.478	726	Natural	55.88	38.55	237	168
1	0.74	726	No Natural Habitat	4.38	3.51	108	177
1	1.776	726	Natural	3.38	2.88	90	185
1	1.961	726	Near Natural	5.13	4.09	102	185
1	2.384	726	Natural	13.88	11.59	119	178
1	2.382	726	Natural	13.88	11.59	119	178
1	2.383	726	Natural	13.88	11.59	119	178
1	2.204	726	Natural	6.63	5.83	117	183
1	1.897	726	Near Natural	5.5	4.73	95	186
1	1.767	726	Near Natural	3.38	2.88	90	185
1	0.584	726	No Natural Habitat	3.5	3.17	115	182
1	1.879	726	No Natural Habitat	6	5	197	175
1	0.795	726	Natural	45.25	32.98	218	179
1	0.786	726	Natural	45.25	32.98	218	179
1	0.78	726	Natural	49.13	34.71	240	175
1	0.905	726	Natural	23.5	18.7	169	179
1	0.779	726	Natural	38.13	28.95	185	176
1	0.803	726	Natural	45.25	32.98	218	179
1	0.803	726	Natural	45.25	32.98	218	179
1	0.788	726	Natural	45.25	32.98	218	179
1	0.794	726	Natural	45.25	32.98	218	179
1	0.791	726	Natural	45.25	32.98	218	179
1	0.804	726	Natural	45.25	32.98	218	179
1	0.8	726	Natural	45.25	32.98	218	179
1	0.797	726	Natural	45.25	32.98	218	179
1	0.795	726	Natural	45.25	32.98	218	179
1	0.804	726	Natural	45.25	32.98	218	179
1	0.8	726	Natural	45.25	32.98	218	179
1	0.793	726	Natural	45.25	32.98	218	179
1	0.797	726	Natural	45.25	32.98	218	179
1	0.774	726	Natural	38.13	28.95	185	176
1	0.776	726	Natural	49.13	34.71	240	175
1	0.786	726	Natural	38.13	28.95	185	176
1	0.8	726	Natural	7.63	6.86	141	166
1	1.667	726	No Natural Habitat	2.5	0.59	77	182
1	2.363	726	No Natural Habitat	2.63	2.29	89	183
1	2.987	726	Near Natural	3.13	2.74	109	182
1	4.408	726	No Natural Habitat	2.5	1.93	129	178
1	6.505	726	Degraded	1.13	0.32	160	181
1	7.268	726	Degraded	2.88	0.7	156	182
1	8.888	726	Degraded	1.25	0.81	164	181
1	10.58	726	Natural	2.38	2.14	185	179
1	10.842	726	Degraded	4.38	3.83	204	181
1	11.763	726	Degraded	2.25	1.74	210	181
1	11.809	726	Degraded	2.63	2.18	210	183
1	9.826	726	Degraded	1.75	1.36	201	183
1	7.403	726	Degraded	1.63	0.23	178	181
1	4.825	726	Natural	4	2.85	184	172
1	1.717	726	No Natural Habitat	2.38	1.98	86	181
1	0.079	726	Natural	40	32.57	195	146
1	0.083	726	Natural	40	32.57	195	146
1	0.08	726	Natural	40	32.57	195	146
1	0.081	726	Natural	40	32.57	195	146
1	0.083	726	Natural	40	32.57	195	146
1	0.085	726	Natural	40	32.57	195	146
1	0.585	726	No Natural Habitat	5.13	3.14	121	178
1	0.26	726	Natural	17.63	15.01	139	179
1	0.092	726	Natural	40	32.57	195	146
1	0.082	726	Natural	40	32.57	195	146
1	0.069	726	Natural	40	32.57	195	146
1	0.078	726	Natural	40	32.57	195	146
1	0.072	726	Natural	40	32.57	195	146
1	0.083	726	Natural	40	32.57	195	146
1	0.073	726	Natural	40	32.57	195	146
1	0.062	726	Natural	40	32.57	195	146
1	0.076	726	Natural	40	32.57	195	146
1	2.471	726	Natural	13.88	11.47	122	185
1	2.482	726	Natural	16.25	13.61	147	178
1	2.521	726	Natural	12.25	10.71	143	180
1	2.503	726	Natural	12.25	10.71	143	180
1	2.32	726	Natural	9.5	7.85	126	179
1	1.941	726	Natural	6.25	5.38	98	186
1	2.264	726	Natural	8.5	7.3	125	185
1	2.106	726	No Natural Habitat	6.75	5.25	120	187
1	1.249	726	Near Natural	1.88	0.64	84	182
1	0.581	726	Natural	39.13	30.63	176	174
1	0.517	726	Natural	55.88	38.55	237	168
1	0.524	726	Natural	55.88	38.55	237	168
1	0.521	726	Natural	55.88	38.55	237	168
1	0.522	726	Natural	55.88	38.55	237	168
1	0.523	726	Natural	55.88	38.55	237	168
1	0.521	726	Natural	55.88	38.55	237	168
1	0.519	726	Natural	55.88	38.55	237	168
1	0.519	726	Natural	55.88	38.55	237	168
1	0.52	726	Natural	55.88	38.55	237	168
1	0.52	726	Natural	55.88	38.55	237	168
1	0.511	726	Natural	55.88	38.55	237	168
1	0.524	726	Natural	55.88	38.55	237	168
1	0.519	726	Natural	55.88	38.55	237	168
1	0.523	726	Natural	55.88	38.55	237	168
1	0.52	726	Natural	55.88	38.55	237	168
1	0.521	726	Natural	55.88	38.55	237	168
1	0.521	726	Natural	55.88	38.55	237	168
1	0.523	726	Natural	55.88	38.55	237	168
1	0.115	726	Natural	28.5	24.53	163	163
1	0.075	726	Natural	40	32.57	195	146
1	0.079	726	Natural	40	32.57	195	146
1	0.084	726	Natural	40	32.57	195	146
1	0.077	726	Natural	40	32.57	195	146
1	0.079	726	Natural	40	32.57	195	146
1	0.079	726	Natural	40	32.57	195	146
1	0.075	726	Natural	40	32.57	195	146
1	0.018	726	Natural	41.13	33.29	194	152
1	0.09	726	Natural	40	32.57	195	146
1	0.027	726	Natural	41.13	33.29	194	152
1	0.03	726	Natural	41.13	33.29	194	152
1	0.057	726	Natural	28.5	24.53	163	163
1	0.043	726	Natural	41.13	33.29	194	152
1	0.056	726	Natural	28.5	24.53	163	163
1	0.032	726	Natural	41.13	33.29	194	152
1	0.015	726	Natural	41.13	33.29	194	152
1	0.059	726	Natural	28.5	24.53	163	163
1	0.05	726	Natural	28.5	24.53	163	163
1	0.061	726	Natural	40	32.57	195	146
1	0.163	726	Natural	44.13	34.32	190	152
1	0.163	726	Natural	44.13	34.32	190	152
1	0.443	726	Natural	48.38	36.06	187	164
1	0.868	726	Natural	45.25	32.98	218	179
1	0.83	726	Natural	45.25	32.98	218	179
1	0.68	726	Natural	48.13	34.83	205	177
1	0.578	726	Natural	5.13	4.05	122	178
1	0.616	726	Natural	4.63	3.51	127	174
1	0.602	726	Natural	12.5	10.35	134	177
1	0.659	726	No Natural Habitat	4.25	3.62	116	179
1	0.59	726	No Natural Habitat	3.5	3.01	117	175
1	0.559	726	No Natural Habitat	5.13	4.05	122	178
1	0.603	726	No Natural Habitat	3.63	3.01	123	175
1	0.506	726	Natural	39.25	29.66	308	179
1	0.514	726	Natural	21.25	17.1	316	195
1	0.488	726	Natural	48.38	36.06	187	164
1	0.558	726	Natural	55.88	38.55	237	168
1	0.789	726	Natural	45.25	32.98	218	179
1	0.336	726	Natural	56	38.83	207	166
1	0.042	726	Natural	44.13	34.97	249	143
1	0.6	726	Natural	47.25	33.44	278	184
1	0.601	726	Natural	48.13	34.83	205	177
1	0.406	726	Natural	56.25	38.89	267	162
1	0.789	726	Natural	39.5	29.3	280	182
1	0.816	726	Natural	38.13	28.95	185	176
1	0.642	726	Natural	48.13	34.83	205	177
1	0.423	726	Natural	56.25	38.89	267	162
1	0.415	726	Natural	56.25	38.89	267	162
1	0.404	726	Natural	33.88	26.86	164	176
1	0.269	726	Natural	41.75	32.39	178	173
1	0.165	726	Natural	26.75	23.42	162	162
1	0.067	726	Natural	40	32.57	195	146
1	0.084	726	Natural	40	32.57	195	146
1	0.075	726	Natural	40	32.57	195	146
1	0.104	726	Natural	43	34.05	244	140
1	0.087	726	Natural	40	32.57	195	146
1	0.083	726	Natural	40	32.57	195	146
1	0.091	726	Natural	40	32.57	195	146
1	0.086	726	Natural	40	32.57	195	146
1	0.074	726	Natural	40	32.57	195	146
1	0.092	726	Natural	40	32.57	195	146
1	0.079	726	Natural	40	32.57	195	146
1	0.079	726	Natural	40	32.57	195	146
1	0.075	726	Natural	40	32.57	195	146
1	0.083	726	Natural	40	32.57	195	146
1	0.081	726	Natural	40	32.57	195	146
1	0.091	726	Natural	40	32.57	195	146
1	0.076	726	Natural	40	32.57	195	146
1	0.079	726	Natural	40	32.57	195	146
1	0.079	726	Natural	40	32.57	195	146
1	0.077	726	Natural	40	32.57	195	146
1	0.086	726	Natural	40	32.57	195	146
1	0.074	726	Natural	40	32.57	195	146
1	0.082	726	Natural	40	32.57	195	146
1	0.083	726	Natural	40	32.57	195	146
1	0.11	726	Natural	34.75	28.1	296	150
1	0.624	726	Natural	11.5	9.81	283	169
1	2.134	726	No Natural Habitat	5.88	4.74	179	176
1	1.767	726	Natural	9.38	7.81	244	173
1	0.854	726	Natural	45.25	32.98	218	179
1	0.792	726	Natural	45.25	32.98	218	179
1	0.786	726	Natural	45.25	32.98	218	179
1	0.783	726	Natural	38.13	28.95	185	176
1	0.79	726	Natural	45.25	32.98	218	179
1	0.481	726	Natural	48.38	36.06	187	164
1	1.167	726	Natural	7.38	5.77	275	176
1	3.197	726	Natural	4.75	4.29	126	181
1	4.717	726	Natural	5	4.23	141	183
1	5.234	726	Natural	2.38	1.88	185	186
1	6.26	726	Natural	5	4.36	214	187
1	6.994	726	No Natural Habitat	3.88	3.47	224	188
1	6.412	726	Natural	4.13	3.55	248	183
1	7.001	726	Degraded	2.38	2.09	262	174
1	7.858	726	Natural	3.13	2.31	226	176
1	6.586	726	Natural	2.88	2.14	179	182
1	4.366	726	No Natural Habitat	5.5	4.46	196	182
1	3.471	726	Natural	5.25	4.9	174	188
1	3.792	726	Natural	3.25	2.93	210	179
1	5.972	726	No Natural Habitat	2	1.87	185	180
1	6.243	726	Degraded	0.75	0.7	180	179
1	7.954	726	Natural	1	0.56	181	180
1	8.088	726	Natural	0.75	0.51	178	179
1	7.553	726	Degraded	0.75	0	177	181
1	3.869	726	No Natural Habitat	1.38	1.29	158	181
1	2.21	726	No Natural Habitat	1	0.75	78	181
1	2.342	726	Natural	12.75	9.79	227	187
1	0.994	726	Degraded	2.38	1.7	329	176
1	0.667	726	Natural	10.25	8.78	277	173
1	3.735	726	Natural	4.25	3.57	207	182
1	4.226	726	Natural	4.25	3.66	197	173
1	3.119	726	Natural	10.63	8.79	131	187
1	2.346	726	Natural	3.63	3.18	172	182
1	4.038	726	Natural	4	3.27	139	182
1	4.365	726	Natural	4	3.4	145	185
1	1.532	726	Natural	21.63	18.38	244	173
1	1.538	726	Natural	21.63	18.38	244	173
1	1.536	726	Natural	21.63	18.38	244	173
1	1.539	726	Natural	21.63	18.38	244	173
1	1.539	726	Natural	21.63	18.38	244	173
1	1.546	726	Natural	21.63	18.38	244	173
1	1.535	726	Natural	21.63	18.38	244	173
1	1.539	726	Natural	21.63	18.38	244	173
1	1.536	726	Natural	21.63	18.38	244	173
1	1.536	726	Natural	21.63	18.38	244	173
1	1.536	726	Natural	21.63	18.38	244	173
1	1.541	726	Natural	21.63	18.38	244	173
1	1.535	726	Natural	21.63	18.38	244	173
1	1.531	726	Natural	21.63	18.38	244	173
1	1.535	726	Natural	21.63	18.38	244	173
1	0.74	726	Natural	49.13	34.71	240	175
1	1.871	726	Natural	9.75	8.32	229	176
1	4.086	726	Natural	4.38	3.61	140	182
1	3.946	726	Natural	4.13	3.31	126	183
1	2.633	726	No Natural Habitat	2.25	2.09	141	181
1	2.776	726	No Natural Habitat	4.13	2.4	91	178
1	3.522	726	Natural	4.13	3.46	195	185
1	3.625	726	Natural	3.88	3.14	218	183
1	5.9	726	Degraded	2.75	2.37	238	179
1	7.388	726	Natural	2.38	1.6	213	178
1	7.864	726	Degraded	3	2.48	236	174
1	7.249	726	Natural	6.5	5.44	241	179
1	5.061	726	Degraded	3.63	3.01	197	186
1	1.943	726	Natural	5.88	5.27	201	184
1	0.085	726	Natural	40	32.57	195	146
1	0.107	726	Natural	40	32.57	195	146
1	0.126	726	Natural	40	32.57	195	146
1	1.883	726	Natural	4	3.48	92	183
1	2.87	726	No Natural Habitat	4.63	3.19	182	185
1	5.651	726	No Natural Habitat	3.25	2.44	159	176
1	5.796	726	No Natural Habitat	2.75	2.44	158	181
1	7.352	726	Degraded	2.63	2.29	152	174
1	10.631	726	Natural	5.63	4.73	174	171
1	11.261	726	No Natural Habitat	1.63	0.49	171	181
1	10.058	726	No Natural Habitat	4.5	3.74	188	169
1	7.768	726	Natural	2.38	2.02	125	175
1	7.765	726	Natural	7.75	6.16	121	188
1	7.755	726	No Natural Habitat	2.38	1.48	130	182
1	5.828	726	No Natural Habitat	3.38	3.06	119	178
1	2.862	726	Natural	2.75	2.47	159	179
1	1.853	726	Degraded	14.38	12.27	278	178
1	0.723	726	Natural	49.13	34.71	240	175
1	0.468	726	Natural	48.38	36.06	187	164
1	0.461	726	Natural	56.25	38.89	267	162
1	0.469	726	Natural	48.38	36.06	187	164
1	0.466	726	Natural	48.38	36.06	187	164
1	0.463	726	Natural	56.25	38.89	267	162
1	0.459	726	Natural	56.25	38.89	267	162
1	0.462	726	Natural	48.38	36.06	187	164
1	0.083	726	Natural	40	32.57	195	146
1	0.106	726	Natural	28.5	24.53	163	163
1	0.077	726	Natural	40	32.57	195	146
1	0.074	726	Natural	40	32.57	195	146
1	0.076	726	Natural	40	32.57	195	146
1	0.138	726	Natural	26.75	23.42	162	162
1	0.095	726	Natural	40	32.57	195	146
1	0.069	726	Natural	40	32.57	195	146
1	0.046	726	Natural	44.13	34.97	249	143
1	0.076	726	Natural	40	32.57	195	146
1	0.074	726	Natural	40	32.57	195	146
1	0.079	726	Natural	40	32.57	195	146
1	0.075	726	Natural	40	32.57	195	146
1	0.076	726	Natural	40	32.57	195	146
1	0.084	726	Natural	40	32.57	195	146
1	0.08	726	Natural	40	32.57	195	146
1	0.075	726	Natural	40	32.57	195	146
1	0.068	726	Natural	40	32.57	195	146
1	0.078	726	Natural	40	32.57	195	146
1	0.074	726	Natural	40	32.57	195	146
1	0.084	726	Natural	40	32.57	195	146
1	0.081	726	Natural	40	32.57	195	146
1	0.053	726	Natural	44.13	34.97	249	143
1	0.074	726	Natural	40	32.57	195	146
1	0.083	726	Natural	40	32.57	195	146
1	0.077	726	Natural	40	32.57	195	146
1	0.082	726	Natural	40	32.57	195	146
1	0.072	726	Natural	40	32.57	195	146
1	0.028	726	Natural	44.13	34.97	249	143
1	0.012	726	Natural	44.13	34.97	249	143
1	0.031	726	Natural	44.13	34.97	249	143
1	0.027	726	Natural	41.13	33.29	194	152
1	0.075	726	Natural	40	32.57	195	146
1	0.02	726	Natural	44.13	34.97	249	143
1	0.064	726	Natural	40	32.57	195	146
1	0.063	726	Natural	40	32.57	195	146
1	0.073	726	Natural	40	32.57	195	146
1	0.155	726	Natural	28.5	24.53	163	163
1	0.077	726	Natural	40	32.57	195	146
1	0.088	726	Natural	40	32.57	195	146
1	0.08	726	Natural	40	32.57	195	146
1	0.067	726	Natural	40	32.57	195	146
1	0.058	726	Natural	44.13	34.97	249	143
1	0.082	726	Natural	40	32.57	195	146
1	0.083	726	Natural	40	32.57	195	146
1	0.028	726	Natural	41.13	33.29	194	152
1	0.129	726	Natural	44.13	34.32	190	152
1	0.025	726	Natural	41.13	33.29	194	152
1	0.022	726	Natural	44.13	34.97	249	143
1	0.019	726	Natural	41.13	33.29	194	152
1	0.023	726	Natural	41.13	33.29	194	152
1	0.052	726	Natural	34.75	28.1	296	150
1	0.025	726	Natural	41.13	33.29	194	152
1	0.08	726	Natural	40	32.57	195	146
1	0.078	726	Natural	40	32.57	195	146
1	0.081	726	Natural	40	32.57	195	146
1	0.079	726	Natural	40	32.57	195	146
1	0.131	726	Natural	44.13	34.32	190	152
1	0.126	726	Natural	47.5	37.35	245	140
1	0.13	726	Natural	47.5	37.35	245	140
1	0.128	726	Natural	47.5	37.35	245	140
1	0.122	726	Natural	47.5	37.35	245	140
1	0.136	726	Natural	47.5	37.35	245	140
1	0.128	726	Natural	47.5	37.35	245	140
1	0.124	726	Natural	47.5	37.35	245	140
1	0.104	726	Natural	47.5	37.35	245	140
1	0.034	726	Natural	41.13	33.29	194	152
1	0.449	726	Natural	48.38	36.06	187	164
1	0.802	726	Natural	45.25	32.98	218	179
1	0.793	726	Natural	45.25	32.98	218	179
1	0.805	726	Natural	45.25	32.98	218	179
1	0.791	726	Natural	45.25	32.98	218	179
1	0.796	726	Natural	45.25	32.98	218	179
1	0.799	726	Natural	45.25	32.98	218	179
1	0.794	726	Natural	45.25	32.98	218	179
1	0.799	726	Natural	45.25	32.98	218	179
1	0.074	726	Natural	40	32.57	195	146
1	0.056	726	Natural	40	32.57	195	146
1	0.077	726	Natural	40	32.57	195	146
1	0.077	726	Natural	40	32.57	195	146
1	0.076	726	Natural	40	32.57	195	146
1	0.043	726	Natural	44.13	34.97	249	143
1	0.071	726	Natural	40	32.57	195	146
1	0.061	726	Natural	40	32.57	195	146
[truncated: 55,673 more rows]
